# Supplementary material for: Pre-Event Self-Efficacy and Sports Performance: A Systematic Review with Meta-Analysis
Source: MDPI journal article supplement (doi:10.3390/sports11110222), 2023-11-12
Supplement: s1 [file s1]

## Supplemental Content Order

**Supplement Table S1.** PRISMA 2020 Checklist

**Supplement Figure S1.** Meta-regression plot of the relationship of study quality for each study sample and the pre-event self-efficacy and sport performance relationship

**Supplement Figure S2.** Meta-regression plot of the relationship of percent male in each study sample and the pre-event self-efficacy and sport performance relationship.

**Supplement Table S2.** Search Results

**Supplement Table S1. PRISMA 2020 Checklist**

| Section and Topic       | Item # | Checklist item                                                                                                                                                                                                                                                                                       | Location where item is reported |
|-------------------------|--------|------------------------------------------------------------------------------------------------------------------------------------------------------------------------------------------------------------------------------------------------------------------------------------------------------|---------------------------------|
| <b>TITLE</b>            |        |                                                                                                                                                                                                                                                                                                      |                                 |
| Title                   | 1      | Identify the report as a systematic review.                                                                                                                                                                                                                                                          | Title                           |
| <b>ABSTRACT</b>         |        |                                                                                                                                                                                                                                                                                                      |                                 |
| Abstract                | 2      | See the PRISMA 2020 for Abstracts checklist.                                                                                                                                                                                                                                                         | Yes, within word limits.        |
| <b>INTRODUCTION</b>     |        |                                                                                                                                                                                                                                                                                                      |                                 |
| Rationale               | 3      | Describe the rationale for the review in the context of existing knowledge.                                                                                                                                                                                                                          | Introduction                    |
| Objectives              | 4      | Provide an explicit statement of the objective(s) or question(s) the review addresses.                                                                                                                                                                                                               | 1.2.                            |
| <b>METHODS</b>          |        |                                                                                                                                                                                                                                                                                                      |                                 |
| Eligibility criteria    | 5      | Specify the inclusion and exclusion criteria for the review and how studies were grouped for the syntheses.                                                                                                                                                                                          | 2.1.                            |
| Information sources     | 6      | Specify all databases, registers, websites, organisations, reference lists and other sources searched or consulted to identify studies. Specify the date when each source was last searched or consulted.                                                                                            | 2.2.                            |
| Search strategy         | 7      | Present the full search strategies for all databases, registers and websites, including any filters and limits used.                                                                                                                                                                                 | 2.2., supplement table, fig.1   |
| Selection process       | 8      | Specify the methods used to decide whether a study met the inclusion criteria of the review, including how many reviewers screened each record and each report retrieved, whether they worked independently, and if applicable, details of automation tools used in the process.                     | 2.1.                            |
| Data collection process | 9      | Specify the methods used to collect data from reports, including how many reviewers collected data from each report, whether they worked independently, any processes for obtaining or confirming data from study investigators, and if applicable, details of automation tools used in the process. | 2.3.                            |
| Data items              | 10a    | List and define all outcomes for which data were sought. Specify whether all results that were compatible with each outcome domain in each study were sought (e.g. for all measures, time points, analyses), and if not, the methods used to decide which results to collect.                        | 2.3.                            |
|                         | 10b    | List and define all other variables for which data were sought (e.g. participant and intervention characteristics, funding sources). Describe any assumptions made about any missing or                                                                                                              | 2.3.                            |

| Section and Topic             | Item # | Checklist item                                                                                                                                                                                                                                                    | Location where item is reported |
|-------------------------------|--------|-------------------------------------------------------------------------------------------------------------------------------------------------------------------------------------------------------------------------------------------------------------------|---------------------------------|
|                               |        | unclear information.                                                                                                                                                                                                                                              |                                 |
| Study risk of bias assessment | 11     | Specify the methods used to assess risk of bias in the included studies, including details of the tool(s) used, how many reviewers assessed each study and whether they worked independently, and if applicable, details of automation tools used in the process. | 2.4.                            |
| Effect measures               | 12     | Specify for each outcome the effect measure(s) (e.g. risk ratio, mean difference) used in the synthesis or presentation of results.                                                                                                                               | 2.5.                            |
| Synthesis methods             | 13a    | Describe the processes used to decide which studies were eligible for each synthesis (e.g. tabulating the study intervention characteristics and comparing against the planned groups for each synthesis (item #5)).                                              | 2.5.                            |
|                               | 13b    | Describe any methods required to prepare the data for presentation or synthesis, such as handling of missing summary statistics, or data conversions.                                                                                                             | 2.5.                            |
|                               | 13c    | Describe any methods used to tabulate or visually display results of individual studies and syntheses.                                                                                                                                                            | 2.5.                            |
|                               | 13d    | Describe any methods used to synthesize results and provide a rationale for the choice(s). If meta-analysis was performed, describe the model(s), method(s) to identify the presence and extent of statistical heterogeneity, and software package(s) used.       | 2.5.                            |
|                               | 13e    | Describe any methods used to explore possible causes of heterogeneity among study results (e.g. subgroup analysis, meta-regression).                                                                                                                              | 2.5.                            |
|                               | 13f    | Describe any sensitivity analyses conducted to assess robustness of the synthesized results.                                                                                                                                                                      | 2.5.                            |
| Reporting bias assessment     | 14     | Describe any methods used to assess risk of bias due to missing results in a synthesis (arising from reporting biases).                                                                                                                                           | 2.5.                            |
| Certainty assessment          | 15     | Describe any methods used to assess certainty (or confidence) in the body of evidence for an outcome.                                                                                                                                                             | 2.5.                            |
| <b>RESULTS</b>                |        |                                                                                                                                                                                                                                                                   |                                 |
| Study selection               | 16a    | Describe the results of the search and selection process, from the number of records identified in the search to the number of studies included in the review, ideally using a flow diagram.                                                                      | 3.1.                            |
|                               | 16b    | Cite studies that might appear to meet the inclusion criteria, but which were excluded, and explain why they were excluded.                                                                                                                                       | 3.1.                            |
| Study characteristics         | 17     | Cite each included study and present its characteristics.                                                                                                                                                                                                         | 3.1.                            |

| Section and Topic             | Item # | Checklist item                                                                                                                                                                                                                                                                       | Location where item is reported         |
|-------------------------------|--------|--------------------------------------------------------------------------------------------------------------------------------------------------------------------------------------------------------------------------------------------------------------------------------------|-----------------------------------------|
| Risk of bias in studies       | 18     | Present assessments of risk of bias for each included study.                                                                                                                                                                                                                         | 3.2.                                    |
| Results of individual studies | 19     | For all outcomes, present, for each study: (a) summary statistics for each group (where appropriate) and (b) an effect estimate and its precision (e.g. confidence/credible interval), ideally using structured tables or plots.                                                     | 3.2.                                    |
| Results of syntheses          | 20a    | For each synthesis, briefly summarise the characteristics and risk of bias among contributing studies.                                                                                                                                                                               | 3.2.                                    |
|                               | 20b    | Present results of all statistical syntheses conducted. If meta-analysis was done, present for each the summary estimate and its precision (e.g. confidence/credible interval) and measures of statistical heterogeneity. If comparing groups, describe the direction of the effect. | 3.2.                                    |
|                               | 20c    | Present results of all investigations of possible causes of heterogeneity among study results.                                                                                                                                                                                       | 3.2., 3.4.                              |
|                               | 20d    | Present results of all sensitivity analyses conducted to assess the robustness of the synthesized results.                                                                                                                                                                           | 3.2., 3.3.                              |
| Reporting biases              | 21     | Present assessments of risk of bias due to missing results (arising from reporting biases) for each synthesis assessed.                                                                                                                                                              | 3.2.                                    |
| Certainty of evidence         | 22     | Present assessments of certainty (or confidence) in the body of evidence for each outcome assessed.                                                                                                                                                                                  | 3.5.                                    |
| <b>DISCUSSION</b>             |        |                                                                                                                                                                                                                                                                                      |                                         |
| Discussion                    | 23a    | Provide a general interpretation of the results in the context of other evidence.                                                                                                                                                                                                    | Discussion, 4.1.                        |
|                               | 23b    | Discuss any limitations of the evidence included in the review.                                                                                                                                                                                                                      | 4.2.                                    |
|                               | 23c    | Discuss any limitations of the review processes used.                                                                                                                                                                                                                                | 4.2                                     |
|                               | 23d    | Discuss implications of the results for practice, policy, and future research.                                                                                                                                                                                                       | Conclusions and across discussion       |
| <b>OTHER INFORMATION</b>      |        |                                                                                                                                                                                                                                                                                      |                                         |
| Registration and protocol     | 24a    | Provide registration information for the review, including register name and registration number, or state that the review was not registered.                                                                                                                                       | Not registered.                         |
|                               | 24b    | Indicate where the review protocol can be accessed, or state that a protocol was not prepared.                                                                                                                                                                                       | All information provided in manuscript. |
|                               | 24c    | Describe and explain any amendments to information provided at registration or in the protocol.                                                                                                                                                                                      | None to report.                         |

| Section and Topic                              | Item # | Checklist item                                                                                                                                                                                                                             | Location where item is reported        |
|------------------------------------------------|--------|--------------------------------------------------------------------------------------------------------------------------------------------------------------------------------------------------------------------------------------------|----------------------------------------|
| Support                                        | 25     | Describe sources of financial or non-financial support for the review, and the role of the funders or sponsors in the review.                                                                                                              | Reported in funding statement.         |
| Competing interests                            | 26     | Declare any competing interests of review authors.                                                                                                                                                                                         | No competing interests                 |
| Availability of data, code and other materials | 27     | Report which of the following are publicly available and where they can be found: template data collection forms; data extracted from included studies; data used for all analyses; analytic code; any other materials used in the review. | Supplement files and manuscript tables |

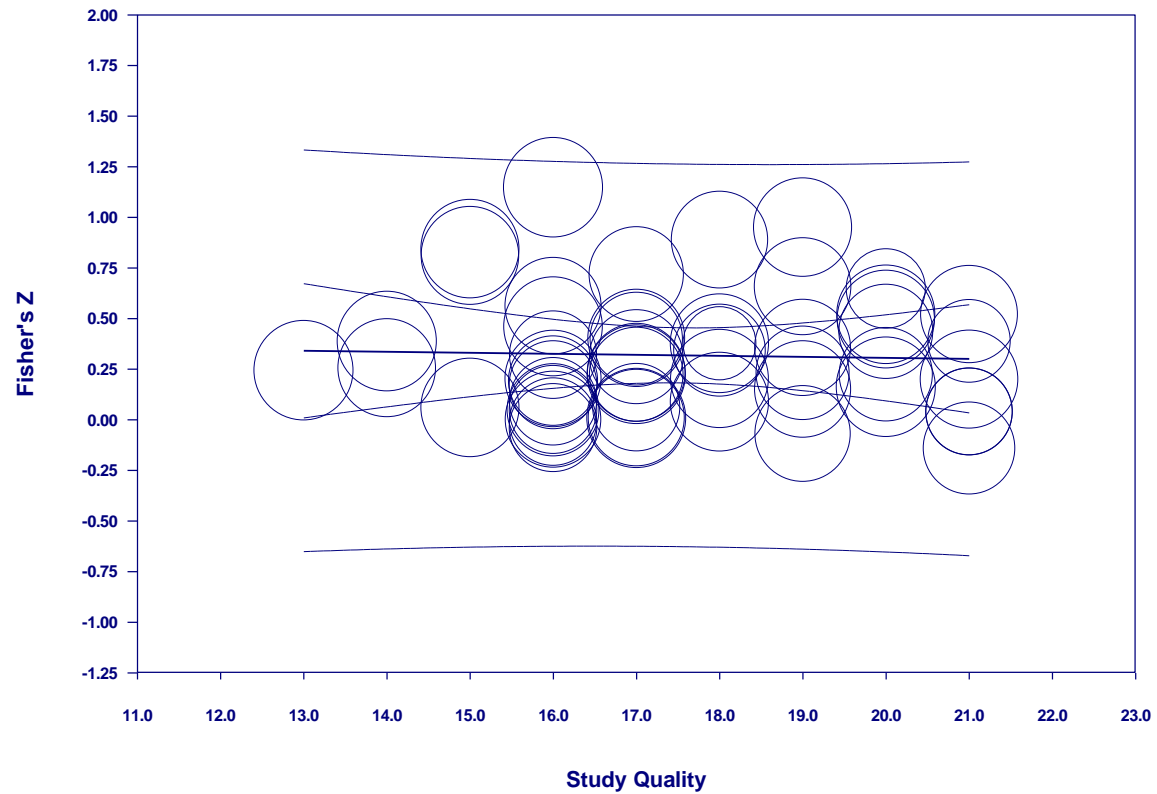

**Supplement Figure S1.** Meta-regression plot of the relationship of study quality for each study sample and the prevent self-efficacy and sport performance relationship. Larger circles represent studies with more participants. The middle line is the regression line, the upper and lower lines are the 95% confidence intervals, and the second set (widest) upper and lower lines are the 95% prediction intervals.

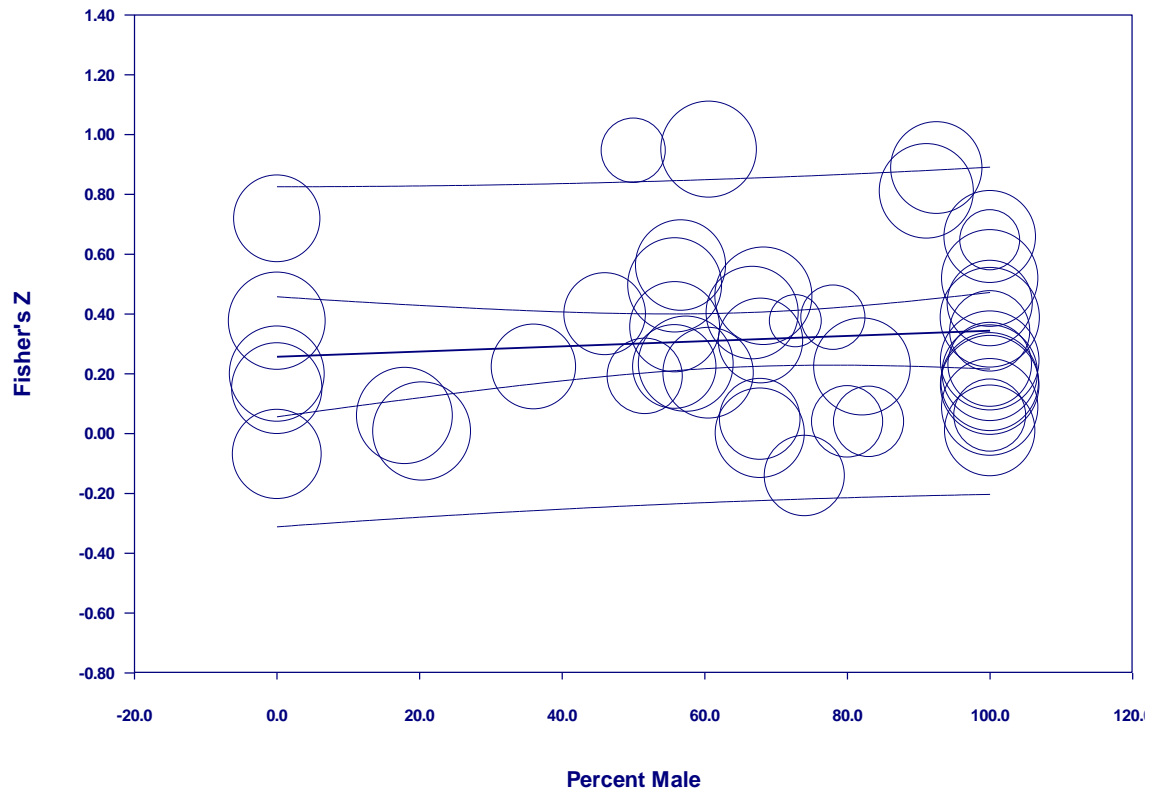

**Supplement Figure S2.** Meta-regression plot of the relationship of percent male in each study sample and the pre-event self-efficacy and sport performance relationship. Larger circles represent studies with more participants. The middle line is the regression line, the upper and lower lines are the 95% confidence intervals, and the second set (widest) upper and lower lines are the 95% prediction intervals.

**Supplement Table S2.** Search results.

| Source |    | Citation                                                                                                                                                                                                                                                                                                                                                                                                                                                                                                                   |
|--------|----|----------------------------------------------------------------------------------------------------------------------------------------------------------------------------------------------------------------------------------------------------------------------------------------------------------------------------------------------------------------------------------------------------------------------------------------------------------------------------------------------------------------------------|
| Moritz | 1  | Barling, J., & Abel, M. (1983). Self-efficacy beliefs and tennis performance. <i>Cognitive Therapy and Research</i> , 7(3), 265–272. <a href="https://doi.org/10.1007/BF01205140">https://doi.org/10.1007/BF01205140</a>                                                                                                                                                                                                                                                                                                   |
| Moritz | 2  | Barnes, M. W., Sime, W., Dienstbier, R. A., & Plake, B. (1986). A test of construct validity of the CSAI-2 questionnaire on male elite college swimmers. <i>International Journal of Sport Psychology</i> , 17(5), 364–374.                                                                                                                                                                                                                                                                                                |
| Moritz | 3  | Bezjak JE, Langga-Sharifi E. Validation of the Physical fitness opinion questionnaire against marathon performance. <i>Perceptual &amp; Motor Skills</i> . 1991;73:993-994. doi:10.2466/PMS.73.7.993-994                                                                                                                                                                                                                                                                                                                   |
| Moritz | 4  | Burton D. Do anxious swimmers swim slower? Reexamining the elusive anxiety-performance relationship. <i>Journal of Sport &amp; Exercise Psychology</i> . 1988;10(1):45-61. doi:10.1123/jsep.10.1.45                                                                                                                                                                                                                                                                                                                        |
| Moritz | 5  | Caruso CM, Dzewaltowski DA, Gill DL. Psychological and physiological changes in competitive state anxiety during noncompetition and competitive success and failure. <i>Journal of Sport &amp; Exercise Psychology</i> . 1990;12:6-20. Accessed March 2, 2022. <a href="https://search-ebscohost-com.lib-e2.lib.ttu.edu/login.aspx?direct=true&amp;db=ofm&amp;AN=508374807&amp;site=ehost-live">https://search-ebscohost-com.lib-e2.lib.ttu.edu/login.aspx?direct=true&amp;db=ofm&amp;AN=508374807&amp;site=ehost-live</a> |
| Moritz | 6  | Ewart CK, Stewart KJ, Gillilan RE, et al. Usefulness of self-efficacy in predicting overexertion during programmed exercise in coronary artery disease. <i>The American journal of cardiology</i> . 1986;57(8):557-561. doi:10.1016/0002-9149(86)90834-9                                                                                                                                                                                                                                                                   |
| Moritz | 7  | Ewart CK, Stewart KJ, Gillilan RE, Kelemen MH. Self-efficacy mediates strength gains during circuit weight training in men with coronary artery disease. <i>Medicine &amp; Science in Sports &amp; Exercise</i> . 1986;18(5):531-540. doi:10.1249/00005768-198610000-00007                                                                                                                                                                                                                                                 |
| Moritz | 8  | Feltz DL. Path Analysis of the Causal Elements in Bandura's Theory of Self-Efficacy and an Anxiety-Based Model of Avoidance Behavior. <i>Journal of Personality &amp; Social Psychology</i> . 1982;42(4):764-781. doi:10.1037/0022-3514.42.4.764                                                                                                                                                                                                                                                                           |
| Moritz | 9  | Feltz, D. L. (1988). Gender differences in the causal elements of self-efficacy on a high avoidance motor task. <i>Journal of Sport and Exercise Psychology</i> , 70, 151-166.                                                                                                                                                                                                                                                                                                                                             |
| Moritz | 10 | Feltz, D. L., Landers, D. M., & Raeder, U. (1979). Enhancing Self-efficacy in High-avoidance Motor Tasks: A Comparison of Modeling Techniques, <i>Journal of Sport Psychology</i> , 1(2), 112-122. Retrieved Mar 2, 2022                                                                                                                                                                                                                                                                                                   |



|        |    |                                                                                                                                                                                                                                                                                                                                                                                                                                                                                                         |
|--------|----|---------------------------------------------------------------------------------------------------------------------------------------------------------------------------------------------------------------------------------------------------------------------------------------------------------------------------------------------------------------------------------------------------------------------------------------------------------------------------------------------------------|
| Moritz | 11 | Feltz DL, Mugno DA. A Replication of the Path Analysis of the Causal Elements in Bandura's Theory of Self-efficacy and the Influence of Autonomic Perception. <i>Journal of Sport Psychology</i> . 1983;5(3):263-277. Accessed March 2, 2022. <a href="https://search-ebscohost-com.lib-e2.lib.ttu.edu/login.aspx?direct=true&amp;db=s3h&amp;AN=20724802&amp;site=ehost-live">https://search-ebscohost-com.lib-e2.lib.ttu.edu/login.aspx?direct=true&amp;db=s3h&amp;AN=20724802&amp;site=ehost-live</a> |
| Moritz | 12 | Feltz, D. L., & Riessinger, C. A. (1990). Effects of in vivo emotive imagery and performance feedback on self-efficacy and muscular endurance. <i>Journal of Sport Psychology</i> , 72, 132-143.                                                                                                                                                                                                                                                                                                        |
| Moritz | 13 | Garcia, A.w., & King, A. C. (1991). Predicting long-term adherence to aerobic exercise: A comparison of two models. <i>Journal of Sport and Exercise Psychology</i> , 73, 394-410.                                                                                                                                                                                                                                                                                                                      |
| Moritz | 14 | George, T. R (1994). Self-confidence and baseball performance: A causal examination of self-efficacy theory. <i>Journal of Sport and Exercise Psychology</i> , 76, 381-399.                                                                                                                                                                                                                                                                                                                             |
| Moritz |    | George 1994 sample 2                                                                                                                                                                                                                                                                                                                                                                                                                                                                                    |
| Moritz | 15 | George, T. R, Feltz, D. L., & Chase, M. A. (1992). Effects of model similarity on self-efficacy and muscular endurance: A second look. <i>Journal of Sport and Exercise Psychology</i> , 74, 237-248.                                                                                                                                                                                                                                                                                                   |
| Moritz | 16 | Gould, D., & Weiss, M. R (1981). The effects of model similarity and model talk on self-efficacy and muscular endurance. <i>Journal of Sport Psychology</i> , 3, 17-29.                                                                                                                                                                                                                                                                                                                                 |
| Moritz | 17 | Kane, T. D., Marks, M. A, Zaccaro, S. J., & Blair, V. (1996). Self-efficacy, personal goals, and wrestlers' self-regulation. <i>Journal of Sport and Exercise Psychology</i> , 78, 36-48.                                                                                                                                                                                                                                                                                                               |
| Moritz | 18 | Kaplan, R M., Ries, A. L., Prewitt, L. M., & Eakin, F. (1994). Self-efficacy expectations predicts survival for patients with chronic obstructive pulmonary disease. <i>Health Psychology</i> , 73, 366-368.                                                                                                                                                                                                                                                                                            |
| Moritz | 19 | Kavanagh, R M., & Hausfeld, S. (1986). Physical performance and self-efficacy under happy and sad moods. <i>Journal of Sport Psychology</i> , 8, 112-123.                                                                                                                                                                                                                                                                                                                                               |
| Moritz | 20 | Krane, V., & Williams, J. (1987). Performance and somatic anxiety, cognitive anxiety and confidence changes prior to competition. <i>Journal of Sport Behavior</i> , 70, 47-56.                                                                                                                                                                                                                                                                                                                         |
| Moritz | 21 | LaGuardia, R., & Labbe, E. E (1993). Self-efficacy and anxiety and their relationship to training and race performance. <i>Perceptual and Motor Skills</i> , 77, 27-34.                                                                                                                                                                                                                                                                                                                                 |
| Moritz | 22 | Lee, C. (1988). The relationship between goal setting, self-efficacy, and female field hockey team performance. <i>International Journal of Sport Psychology</i> , 20, 147-161.                                                                                                                                                                                                                                                                                                                         |
| Moritz | 23 | Lerner, B.S., & Locke, EA (1995). The effects of goal setting, self-efficacy, competition and personal traits on performance                                                                                                                                                                                                                                                                                                                                                                            |

|        |    |                                                                                                                                                                                                                                    |
|--------|----|------------------------------------------------------------------------------------------------------------------------------------------------------------------------------------------------------------------------------------|
|        |    | of an endurance task. Journal of Sport and Exercise Psychology, 77, 138-152.                                                                                                                                                       |
| Moritz | 24 | Martin, J. J. & Gill, D. L. (1991). The relationships among competitive orientation, sport-confidence, self-efficacy, anxiety, and performance. Journal of Sport and Exercise Psychology, 73, 149--159.                            |
| Moritz | 25 | Martin, J. J., & Gill, D. L. (1995). The relationships of competitive orientations and self-efficacy to goal importance, thoughts, and performance in high school distance runners. Journal of Applied Sport Psychology, 7, 50-62. |
| Moritz | 26 | Maynard, I. W., & Howe, B. L. (1987). Interrelations of trait and state anxiety with game performance of rugby players. Perceptual and Motor Skills, 64, 599--602.                                                                 |
| Moritz | 27 | McAuley, E. (1985). State anxiety: Antecedent or result of sport performance? Journal of Sport Behavior, 8, 71-77.                                                                                                                 |
| Moritz | 28 | McAuley, E. (1985). Modelling and self-efficacy: A test of Bandura's model. Journal of Sport Psychology, 7, 283-295.                                                                                                               |
| Moritz | 29 | McAuley, E. (1992). The role of efficacy cognitions in the prediction of exercise behavior in middle-aged adults. Journal of Behavioral Medicine, 75, 65-88.                                                                       |
| Moritz | 30 | McAuley, E. (1993). Self-efficacy and the maintenance of exercise participation in older adults. Journal of Behavioral Medicine, 76, 103-113.                                                                                      |
| Moritz | 31 | McAuley, E., & Courneya, K. S. (1992). Self-efficacy relationships with affective and exertion responses to exercise. Journal of Applied Social Psychology, 22, 312-326.                                                           |
| Moritz | 32 | McAuley, E., & Courneya, K. S., & Lettunich, J. (1991). Effects of acute and long-term exercise on self-efficacy responses in sedentary, middle-aged males and females. The Gerontologist, 37, 534-542.                            |
| Moritz | 33 | McAuley, E., & Gill, D. L. (1983). Reliability and validity of the physical self-efficacy scale in a competitive sport setting. Journal of Sport Psychology, 5, 410-418.                                                           |
| Moritz | 34 | McCullagh, P. (1987). Model similarity effects on motor performance. Journal of Sport Psychology, 9, 249-260.                                                                                                                      |
| Moritz | 35 | Miller, J. T., & McAuley, E. (1987). Effects of a goal-setting training program on basketball free-throw self-efficacy and performance. The Sport Psychologist, 7, 103-113.                                                        |
| Moritz | 36 | Murphy, S. M., & Woolfolk, R. L. (1987). The effects of cognitive interventions on competitive anxiety and performance on a fine motor skill accuracy task. International Journal of Sport Psychology, 78, 152-166.                |
| Moritz | 37 | Okwumabua, M. (1985). Psychological and physical contributions to marathon performance: An exploratory investigation. Journal of Sport Behavior, 8, 163-171.                                                                       |

|            |    |                                                                                                                                                                                                                                                                                                                                                                                                                                                                                        |
|------------|----|----------------------------------------------------------------------------------------------------------------------------------------------------------------------------------------------------------------------------------------------------------------------------------------------------------------------------------------------------------------------------------------------------------------------------------------------------------------------------------------|
| Moritz     | 38 | Taylor, C. B., Bandura, A., Ewart, C. K., Miller, N. H., & DeBusk, R. F. (1985). Exercise testing to enhance wives confidence in their husbands' cardiac capability soon after clinically uncomplicated acute myocardial infarction. <i>American Journal of Cardiology</i> , 55, 635-638.                                                                                                                                                                                              |
| Moritz     | 39 | Theodorakis, Y. (1995). Effects of self-efficacy, satisfaction and personal goals on swimming performance. <i>The Sport Psychologist</i> , 9, 245-253.                                                                                                                                                                                                                                                                                                                                 |
| Moritz     | 40 | Treasure, D. C., Monson, J., & Iox, C. I. (1996). Relationship between self-efficacy, wrestling performance, and affect prior to competition. <i>The Sport Psychologist</i> , 10, 73-83.                                                                                                                                                                                                                                                                                               |
| Moritz     | 41 | Vealey, R. (1986). Conceptualization of sport-confidence and competitive orientation: Preliminary investigation and instrument development. <i>Journal of Sport Psychology</i> , 8, 221-246.                                                                                                                                                                                                                                                                                           |
| Moritz     |    | Vealey sample 2                                                                                                                                                                                                                                                                                                                                                                                                                                                                        |
| Moritz     | 42 | Weinberg, R. S., Yukelson, D., & Jackson, A. (1980). Effects of public and private efficacy expectations on competitive performance. <i>Journal of Sport Psychology</i> , 2, 340-349.                                                                                                                                                                                                                                                                                                  |
| Moritz     | 43 | Wells, C. M., Collins, D., & Hale, B. D. (1993). The self-efficacy performance link in maximum strength performance. <i>Journal of Sport Sciences</i> , 11, 167-175.                                                                                                                                                                                                                                                                                                                   |
| Moritz     | 44 | Wilkes, R. T., & Summers, J. J. (1984). Cognitions, mediating variables, and strength performance. <i>Journal of Sport Psychology</i> , 6, 351-359.                                                                                                                                                                                                                                                                                                                                    |
| Moritz     | 45 | Woolfolk, R. T., Murphy, S. M., Gottesfeld, D., & Aitken, D. (1985). Effects of mental rehearsal of task motor activity and mental depiction of task outcome on motor skill performance. <i>Journal of Sport Psychology</i> , 7, 191-197.                                                                                                                                                                                                                                              |
|            |    |                                                                                                                                                                                                                                                                                                                                                                                                                                                                                        |
| Search.One | 1  | Besharat, M. A., & Pourbohloul, S. (2011). Moderating effects of self-confidence and sport self-efficacy on the relationship between competitive anxiety and sport performance. <i>Psychology</i> , 2(7), 760-765. <a href="https://doi-org.lib-e2.lib.ttu.edu/10.4236/psych.2011.27116">https://doi-org.lib-e2.lib.ttu.edu/10.4236/psych.2011.27116</a>                                                                                                                               |
| Search.One | 2  | Arruza, J. A., Telletxea, S., De Montes, L. G., Arribas, S., Balagué, G., Cecchini, J. A., & Brustad, R. J. (2009). Understanding the relationship between perceived development of the competition plan and sport performance: Mediating effects of self-efficacy and state depression. <i>Perceptual and Motor Skills</i> , 109(1), 304-314. <a href="https://doi-org.lib-e2.lib.ttu.edu/10.2466/pms.109.1.304-314">https://doi-org.lib-e2.lib.ttu.edu/10.2466/pms.109.1.304-314</a> |
| Search.One | 3  | Miller, M., Carlyle, S., & Pease, R. (1992). The relationship between motivation and self-efficacy in competitive athletes participating in swimming, ice hockey, and basketball. <i>Journal of Sport Behavior</i> , 15(3), 201-208.                                                                                                                                                                                                                                                   |

|            |    |                                                                                                                                                                                                                                                                                                                                                                                                                |
|------------|----|----------------------------------------------------------------------------------------------------------------------------------------------------------------------------------------------------------------------------------------------------------------------------------------------------------------------------------------------------------------------------------------------------------------|
| Search.One | 4  | Miller, M. (1993). Efficacy strength and performance in competitive swimmers of different skill levels. <i>International Journal of Sport Psychology</i> , 24(3), 284–296.                                                                                                                                                                                                                                     |
| Search.One | 5  | Vilar, L., Araújo, D., Davids, K., & Renshaw, I. (2012). The need for “representative task design” in evaluating efficacy of skills tests in sport: A comment on Russell, Benton and Kingsley (2010). <i>Journal of Sports Sciences</i> , 30(16), 1727–1730. <a href="https://doi-org.lib-e2.lib.ttu.edu/10.1080/02640414.2012.679674">https://doi-org.lib-e2.lib.ttu.edu/10.1080/02640414.2012.679674</a>     |
| Search.One | 6  | Baretta, D., Greco, A., & Steca, P. (2017). Understanding performance in risky sport: The role of self-efficacy beliefs and sensation seeking in competitive freediving. <i>Personality and Individual Differences</i> , 117, 161–165. <a href="https://doi-org.lib-e2.lib.ttu.edu/10.1016/j.paid.2017.06.006">https://doi-org.lib-e2.lib.ttu.edu/10.1016/j.paid.2017.06.006</a>                               |
| Search.One | 7  | Sklett, V. H., Lorås, H. W., & Sigmundsson, H. (2018). Self-efficacy, flow, affect, worry and performance in elite World Cup ski jumping. <i>Frontiers in Psychology</i> , 9. <a href="https://doi-org.lib-e2.lib.ttu.edu/10.3389/fpsyg.2018.01215">https://doi-org.lib-e2.lib.ttu.edu/10.3389/fpsyg.2018.01215</a>                                                                                            |
| Search.One | 8  | Nicholls, A. R., Polman, R., & Levy, A. R. (2010). Coping self-efficacy, pre-competitive anxiety, and subjective performance among athletes. <i>European Journal of Sport Science</i> , 10(2), 97–102. <a href="https://doi-org.lib-e2.lib.ttu.edu/10.1080/17461390903271592">https://doi-org.lib-e2.lib.ttu.edu/10.1080/17461390903271592</a>                                                                 |
| Search.One | 9  | Kuczka, K. K., & Treasure, D. C. (2005). Self-handicapping in competitive sport: Influence of the motivational climate, self-efficacy, and perceived importance. <i>Psychology of Sport and Exercise</i> , 6(5), 539–550. <a href="https://doi-org.lib-e2.lib.ttu.edu/10.1016/j.psychsport.2004.03.007">https://doi-org.lib-e2.lib.ttu.edu/10.1016/j.psychsport.2004.03.007</a>                                |
| Search.One | 10 | Martin, J. J. (1995). Competitive orientation, self-efficacy and goal importance in Filipino marathoners. <i>International Journal of Sport Psychology</i> , 26(3), 348–358.                                                                                                                                                                                                                                   |
| Search.One | 11 | Vealey, R. S. (2019). A periodization approach to building confidence in athletes. <i>Journal of Sport Psychology in Action</i> , 10(1), 26–37. <a href="https://doi-org.lib-e2.lib.ttu.edu/10.1080/21520704.2018.1496213">https://doi-org.lib-e2.lib.ttu.edu/10.1080/21520704.2018.1496213</a>                                                                                                                |
| Search.One | 12 | Leonardi, T. J., Starapoli Martins, M. C., de Barros Gonçalves, C. E., Rodrigues Paes, R., & Gonçalves Moreira de Carvalho, H. J. (2019). Changes in tactical performance and self-efficacy on young female basketball players. / Variações na performance tática e na autoeficácia de jovens meninas atletas de basquetebol. <i>Brazilian Journal of Kineanthropometry &amp; Human Performance</i> , 21, 1–9. |
| Search.One | 13 | Boat, R., & Taylor, I. M. (2015). Patterns of Change in Psychological Variables Leading up to Competition in Superior Versus Inferior Performers. <i>Journal of Sport &amp; Exercise Psychology</i> , 37(3), 244–256.                                                                                                                                                                                          |

|            |    |                                                                                                                                                                                                                                                                                                                                                                                                                                 |
|------------|----|---------------------------------------------------------------------------------------------------------------------------------------------------------------------------------------------------------------------------------------------------------------------------------------------------------------------------------------------------------------------------------------------------------------------------------|
| Search.One | 14 | Bruton, A. M., Mellalieu, S. D., Shearer, D., Roderique-Davies, G., & Hall, R. (2013). Performance accomplishment information as predictors of self-efficacy as a function of skill level in amateur golf. <i>Journal of Applied Sport Psychology</i> , 25(2), 197–208. <a href="https://doi-org.lib-e2.lib.ttu.edu/10.1080/10413200.2012.705802">https://doi-org.lib-e2.lib.ttu.edu/10.1080/10413200.2012.705802</a>           |
| Search.One | 15 | Karimian, M., Kashefolhagh, F., Dadashi, M. S., & Chharbaghi, Z. (2010). The effect of relaxation and mental imagery on self-efficacy, competitive anxiety and sportive performance. <i>British Journal of Sports Medicine</i> , 44(S1), i57.                                                                                                                                                                                   |
| Search.One | 16 | Hazell, J., Cotterill, S. T., & Hill, D. M. (2014). An exploration of pre-performance routines, self-efficacy, anxiety and performance in semi-professional soccer. <i>European Journal of Sport Science</i> , 14(6), 603–610. <a href="https://doi-org.lib-e2.lib.ttu.edu/10.1080/17461391.2014.888484">https://doi-org.lib-e2.lib.ttu.edu/10.1080/17461391.2014.888484</a>                                                    |
| Search.One | 17 | Pattinson, E. M., Cotterill, S. T., & Leyland, S. D. (2017). Sources of self-efficacy in springboard and highboard diving: A qualitative investigation. <i>Sport &amp; Exercise Psychology Review</i> , 13(1), 80–91.                                                                                                                                                                                                           |
| Search.One | 18 | García-Naveira Vaamonde, A. (2018). Optimismo, autoeficacia general y competitividad en jóvenes atletas de alto rendimiento. / Optimism, general self-efficacy and competitiveness in young high-performance athletes. <i>Cultura, Ciencia y Deporte</i> , 13(37), 71–81.                                                                                                                                                       |
| Search.One | 19 | Chase, M. A., Magyar, T. M., & Drake, B. M. (2005). Fear of injury in gymnastics: Self-efficacy and psychological strategies to keep on tumbling. <i>Journal of Sports Sciences</i> , 23(5), 465–475. <a href="https://doi-org.lib-e2.lib.ttu.edu/10.1080/02640410400021427">https://doi-org.lib-e2.lib.ttu.edu/10.1080/02640410400021427</a>                                                                                   |
| Search.One | 20 | Avugos, S., Bar-Eli, M., Ritov, I., & Sher, E. (2013). The elusive reality of efficacy–performance cycles in basketball shooting: An analysis of players’ performance under invariant conditions. <i>International Journal of Sport and Exercise Psychology</i> , 11(2), 184–202. <a href="https://doi-org.lib-e2.lib.ttu.edu/10.1080/1612197X.2013.773661">https://doi-org.lib-e2.lib.ttu.edu/10.1080/1612197X.2013.773661</a> |
| Search.One | 21 | Head Over Heels With Success: The Relationship Between Self-Efficacy and Performance in Competitive Youth Gymnastics. (1989). <i>Journal of Sport &amp; Exercise Psychology</i> , 11(4), 444–451.                                                                                                                                                                                                                               |
| Search.One | 22 | Liu, W., & Chepyator-Thomson, J. R. (2009). Field Dependence-Independence and Physical Activity Engagement among Middle School Students. <i>Physical Education and Sport Pedagogy</i> , 14(2), 125–136.                                                                                                                                                                                                                         |
| Search.One | 23 | Ramsey, R., Cumming, J., Edwards, M. G., Williams, S., & Brunning, C. (2010). Examining the emotion aspect of                                                                                                                                                                                                                                                                                                                   |

|            |    |                                                                                                                                                                                                                                                                                                                                                       |
|------------|----|-------------------------------------------------------------------------------------------------------------------------------------------------------------------------------------------------------------------------------------------------------------------------------------------------------------------------------------------------------|
|            |    | PETTLEP-based imagery with penalty taking in soccer. <i>Journal of Sport Behavior</i> , 33(3), 295–314.                                                                                                                                                                                                                                               |
| Search.One | 24 | Bueno, J., Capdevila, L., & Fernández-Castro, J. (2002). Sufrimiento competitivo y rendimiento en deportes de resistencia = Competitive suffering and performance in endurance sports. <i>Revista de Psicología Del Deporte</i> , 11(2), 209–226.                                                                                                     |
| Search.One | 25 | Smrdu, M. (2015). First-Person Experience of Optimal Sport Competition Performance of Elite Team Athletes. <i>Kinesiology</i> , 47(2), 169–178.                                                                                                                                                                                                       |
| Search.One | 26 | Lee, C. (1982). Self-efficacy as a Predictor of Performance in Competitive Gymnastics. <i>Journal of Sport Psychology</i> , 4(4), 405–409.                                                                                                                                                                                                            |
| Search.One | 27 | Psychountaki, M., & Zervas, Y. (2000). Competitive worries, sport confidence, and performance ratings for young swimmers. <i>Perceptual and Motor Skills</i> , 91(1), 87–94. <a href="https://doi-org.lib-e2.lib.ttu.edu/10.2466/PMS.91.5.87-94">https://doi-org.lib-e2.lib.ttu.edu/10.2466/PMS.91.5.87-94</a>                                        |
| Search.One | 28 | Scanlan, T. K., & Passer, M. W. (1979). Factors Influencing the Competitive Performance Expectancies of Young Female Athletes. <i>Journal of Sport Psychology</i> , 1(3), 212–220.                                                                                                                                                                    |
| Search.One | 29 | Zabala, M., Morente-Sánchez, J., Mateo-March, M., & Sanabria, D. (2016). Relationship Between Self-Reported Doping Behavior and Psychosocial Factors in Adult Amateur Cyclists. <i>Sport Psychologist</i> , 30(1), 68–75.                                                                                                                             |
| Search.One | 30 | Hall, H. K., & Kerr, A. W. (1998). Predicting achievement anxiety: A social-cognitive perspective. <i>Journal of Sport &amp; Exercise Psychology</i> , 20(1), 98–111.                                                                                                                                                                                 |
| Search.One | 31 | Slimani, M., Chamari, K., Boudhiba, D., & Chéour, F. (2016). Mediator and moderator variables of imagery use-motor learning and sport performance relationships: a narrative review. <i>Sport Sciences for Health</i> , 12(1), 1–9.                                                                                                                   |
| Search.One | 32 | Rojas, N. G. (2007). Implicaciones de la autoeficacia en el rendimiento deportivo = Implications of self-efficacy in sporting performance. <i>Pensamiento Psicológico</i> , 3(9), 21–32.                                                                                                                                                              |
| Search.One | 33 | Beaven, C. M. (2017). Mental Rehearsal Impacts Hormones and Subsequent Sport-Specific Performance. <i>New Zealand Journal of Sports Medicine</i> , 44(1), 41–42.                                                                                                                                                                                      |
| Search.One | 34 | Bruton, A. M., Shearer, D. A., & Mellalieu, S. D. (2019). Who said “there is no ‘I’ in team”? The effects of observational learning content level on efficacy beliefs in groups. <i>Psychology of Sport &amp; Exercise</i> , 45, N.PAG.                                                                                                               |
| Search.One | 35 | Meijen, C., Jones, M. V., McCarthy, P. J., Sheffield, D., & Allen, M. S. (2013). Cognitive and affective components of challenge and threat states. <i>Journal of Sports Sciences</i> , 31(8), 847–855. <a href="https://doi-org.lib-e2.lib.ttu.edu/10.1080/02640414.2012.753157">https://doi-org.lib-e2.lib.ttu.edu/10.1080/02640414.2012.753157</a> |

|            |    |                                                                                                                                                                                                                                                                                                                                                                                                                 |
|------------|----|-----------------------------------------------------------------------------------------------------------------------------------------------------------------------------------------------------------------------------------------------------------------------------------------------------------------------------------------------------------------------------------------------------------------|
| Search.One | 36 | Efficacy Expectations and Perceptions of Causality in Motor Performance. (1987). <i>Journal of Sport Psychology</i> , 9(4), 385–393.                                                                                                                                                                                                                                                                            |
| Search.One | 37 | Otten, M. (2009). Choking vs clutch performance: A study of sport performance under pressure. <i>Journal of Sport &amp; Exercise Psychology</i> , 31(5), 583–601. <a href="https://doi-org.lib-e2.lib.ttu.edu/10.1123/jsep.31.5.583">https://doi-org.lib-e2.lib.ttu.edu/10.1123/jsep.31.5.583</a>                                                                                                               |
| Search.One | 38 | Chow, G. M., Hepler, T. J., & Feltz, D. L. (2007). The effects of group motivational processes on individual performance in women's volleyball. <i>Journal of Sport &amp; Exercise Psychology</i> , 29, S152–S153.                                                                                                                                                                                              |
| Search.One | 39 | Jones, M., Meijen, C., McCarthy, P. J., & Sheffield, D. (2009). A Theory of Challenge and Threat States in Athletes. <i>International Review of Sport &amp; Exercise Psychology</i> , 2(2), 161–180.                                                                                                                                                                                                            |
| Search.One | 40 | Middlemas, S., & Harwood, C. (2020). A pre-match video self-modeling intervention in elite youth football. <i>Journal of Applied Sport Psychology</i> , 32(5), 450–475. <a href="https://doi-org.lib-e2.lib.ttu.edu/10.1080/10413200.2019.1590481">https://doi-org.lib-e2.lib.ttu.edu/10.1080/10413200.2019.1590481</a>                                                                                         |
| Search.One | 41 | Boes, R., Harung, H. S., Travis, F., & Pensgaard, A. M. (2014). Mental and physical attributes defining world-class Norwegian athletes: Content analysis of interviews. <i>Scandinavian Journal of Medicine &amp; Science in Sports</i> , 24(2), 422–427. <a href="https://doi-org.lib-e2.lib.ttu.edu/10.1111/j.1600-0838.2012.01498.x">https://doi-org.lib-e2.lib.ttu.edu/10.1111/j.1600-0838.2012.01498.x</a> |
| Search.One | 42 | Thelwell, R. C., & Maynard, I. W. (2000). Professional cricketers' perceptions of the importance of antecedents influencing repeatable good performance. <i>Perceptual and Motor Skills</i> , 90(2), 649–658. <a href="https://doi-org.lib-e2.lib.ttu.edu/10.2466/PMS.90.2.649-658">https://doi-org.lib-e2.lib.ttu.edu/10.2466/PMS.90.2.649-658</a>                                                             |
| Search.One | 43 | Turner, M. J., Jones, M. V., Sheffield, D., & Cross, S. L. (2012). Cardiovascular indices of challenge and threat states predict competitive performance. <i>International Journal of Psychophysiology</i> , 86(1), 48–57. <a href="https://doi-org.lib-e2.lib.ttu.edu/10.1016/j.ijpsycho.2012.08.004">https://doi-org.lib-e2.lib.ttu.edu/10.1016/j.ijpsycho.2012.08.004</a>                                    |
| Search.One | 44 | Fazlagić, A., & Belić, M. (2011). Locus Kontrole I Flow Uspješnih Sportista. / Locus of Control and Flow of Successful Sportsman. <i>Sportekspert</i> , 4(1/2), 7–11.                                                                                                                                                                                                                                           |
| Search.One | 45 | Deeter, T. E. (1990). Re-modeling expectancy and value in physical activity. <i>Journal of Sport &amp; Exercise Psychology</i> , 12(1), 86–91.                                                                                                                                                                                                                                                                  |
| Search.One | 46 | Gil Martínez, J., Capafons Bonet, A., & Labrador Encinas, F. (1993). Variables físicas y psicológicas predictoras del rendimiento deportivo y del cambio terapéutico = Physical and psychological variables predictive of sports output and therapeutical change. <i>Psicothema</i> , 5(1), 97–110.                                                                                                             |

|            |    |                                                                                                                                                                                                                                                                                                                                                                                                                            |
|------------|----|----------------------------------------------------------------------------------------------------------------------------------------------------------------------------------------------------------------------------------------------------------------------------------------------------------------------------------------------------------------------------------------------------------------------------|
| Search.One | 47 | Suay, F., Salvador, A., González-Bono, E., Sanchís, C., Martínez, M., Martínéz-Sanchis, S., Simón, V. M., & Montoro, J. B. (1999). Effects of competition and its outcome on serum testosterone, cortisol and prolactin. <i>Psychoneuroendocrinology</i> , 24(5), 551–566. <a href="https://doi-org.lib-e2.lib.ttu.edu/10.1016/S0306-4530(99)00011-6">https://doi-org.lib-e2.lib.ttu.edu/10.1016/S0306-4530(99)00011-6</a> |
| Search.One | 48 | Gernigon, C., Briki, W., & Eykens, K. (2010). The dynamics of psychological momentum in sport: The role of ongoing history of performance patterns. <i>Journal of Sport &amp; Exercise Psychology</i> , 32(3), 377–400.                                                                                                                                                                                                    |
| Search.One | 49 | Toering, T. T., Elferink-Gemser, M. T., Jordet, G., & Visscher, C. (2009). Self-regulation and performance level of elite and non-elite youth soccer players. <i>Journal of Sports Sciences</i> , 27(14), 1509–1517. <a href="https://doi-org.lib-e2.lib.ttu.edu/10.1080/02640410903369919">https://doi-org.lib-e2.lib.ttu.edu/10.1080/02640410903369919</a>                                                               |
| Search.One | 50 | WILLIAMS, E. L., JONES, H. S., SPARKS, S. A., MIDGLEY, A. W., MARCHANT, D. C., BRIDGE, C. A., & MCNAUGHTON, L. R. (2015). Altered Psychological Responses to Different Magnitudes of Deception during Cycling. <i>Medicine &amp; Science in Sports &amp; Exercise</i> , 47(11), 2423–2430.                                                                                                                                 |
| Search.One | 51 | Greenlees, I. A., Nunn, R. L., Graydon, J. K., & Maynard, I. W. (1999). The relationship between collective efficacy and precompetitive affect in rugby players: Testing Bandura's model of collective efficacy. <i>Perceptual and Motor Skills</i> , 89(2), 431–440. <a href="https://doi-org.lib-e2.lib.ttu.edu/10.2466/PMS.89.6.431-440">https://doi-org.lib-e2.lib.ttu.edu/10.2466/PMS.89.6.431-440</a>                |
| Search.One | 52 | Donovan, J. J., & Williams, K. J. (2003). Missing the mark: Effects of time and causal attributions on goal revision in response to goal-performance discrepancies. <i>Journal of Applied Psychology</i> , 88(3), 379–390. <a href="https://doi-org.lib-e2.lib.ttu.edu/10.1037/0021-9010.88.3.379">https://doi-org.lib-e2.lib.ttu.edu/10.1037/0021-9010.88.3.379</a>                                                       |
| Search.One | 53 | Wiggins, M. S. (1998). Anxiety intensity and direction: Preperformance temporal patterns and expectations in athletes. <i>Journal of Applied Sport Psychology</i> , 10(2), 201–211. <a href="https://doi-org.lib-e2.lib.ttu.edu/10.1080/10413209808406388">https://doi-org.lib-e2.lib.ttu.edu/10.1080/10413209808406388</a>                                                                                                |
| Search.One | 54 | Sheard, M., & Golby, J. (2006). Effect of a Psychological Skills Training Program on Swimming Performance and Positive Psychological Development. <i>International Journal of Sport and Exercise Psychology</i> , 4(2), 149–169. <a href="https://doi-org.lib-e2.lib.ttu.edu/10.1080/1612197X.2006.9671790">https://doi-org.lib-e2.lib.ttu.edu/10.1080/1612197X.2006.9671790</a>                                           |
| Search.One | 55 | Kingston, K. M., & Hardy, L. (1997). Effects of different types of goals on processes that support performance. <i>The Sport Psychologist</i> , 11(3), 277–293.                                                                                                                                                                                                                                                            |
| Search.One | 56 | Reifsteck, E. J., Anderson, S. N., Newton, J. D., & Maher, J. P. (2021). A practical guide and empirical example for                                                                                                                                                                                                                                                                                                       |



|            |    |                                                                                                                                                                                                                                                                                                                                                                                       |
|------------|----|---------------------------------------------------------------------------------------------------------------------------------------------------------------------------------------------------------------------------------------------------------------------------------------------------------------------------------------------------------------------------------------|
|            |    | implementing ecological momentary assessment in sport psychology research with athletes. <i>Sport, Exercise, and Performance Psychology</i> , 10(3), 408–422. <a href="https://doi-org.lib-e2.lib.ttu.edu/10.1037/spy0000252">https://doi-org.lib-e2.lib.ttu.edu/10.1037/spy0000252</a>                                                                                               |
| Search.One | 57 | Coutts, A. J., & Reaburn, P. (2008). Monitoring changes in rugby league players' perceived stress and recovery during intensified training. <i>Perceptual and Motor Skills</i> , 106(3), 904–916. <a href="https://doi-org.lib-e2.lib.ttu.edu/10.2466/PMS.106.3.904-916">https://doi-org.lib-e2.lib.ttu.edu/10.2466/PMS.106.3.904-916</a>                                             |
| Search.One | 58 | Hall, C. R., Munroe-Chandler, K. J., Fishburne, G. J., & Hall, N. D. (2009). The Sport Imagery Questionnaire for Children (SIQ-C). <i>Measurement in Physical Education and Exercise Science</i> , 13(2), 93–107. <a href="https://doi-org.lib-e2.lib.ttu.edu/10.1080/10913670902812713">https://doi-org.lib-e2.lib.ttu.edu/10.1080/10913670902812713</a>                             |
| Search.One | 59 | McAuley, E., & Gill, D. (1983). Reliability and validity of the physical self-efficacy scale in a competitive sport setting. <i>Journal of Sport Psychology</i> , 5(4), 410–418.                                                                                                                                                                                                      |
| Search.One | 60 | Martin, J. J., & Gill, D. L. (1995). The relationships of competitive orientations and self-efficacy to goal importance, thoughts, and performance in high school distance runners. <i>Journal of Applied Sport Psychology</i> , 7(1), 50–62. <a href="https://doi-org.lib-e2.lib.ttu.edu/10.1080/10413209508406300">https://doi-org.lib-e2.lib.ttu.edu/10.1080/10413209508406300</a> |
| Search.One | 61 | LaGuardia, R., & Labbé, E. E. (1993). Self-efficacy and anxiety and their relationship to training and race performance. <i>Perceptual and Motor Skills</i> , 77(1), 27–34. <a href="https://doi-org.lib-e2.lib.ttu.edu/10.2466/pms.1993.77.1.27">https://doi-org.lib-e2.lib.ttu.edu/10.2466/pms.1993.77.1.27</a>                                                                     |
| Search.One | 62 | George, T. R. (1994). Self-confidence and baseball performance: A causal examination of self-efficacy theory. <i>Journal of Sport &amp; Exercise Psychology</i> , 16(4), 381–399.                                                                                                                                                                                                     |
| Search.One | 63 | Kane, T. D., Marks, M. A., Zaccaro, S. J., & Blair, V. (1996). Self-efficacy, personal goals, and wrestlers' self-regulation. <i>Journal of Sport &amp; Exercise Psychology</i> , 18(1), 36–48.                                                                                                                                                                                       |
|            |    |                                                                                                                                                                                                                                                                                                                                                                                       |
| Search.Two | 1  | Gabriel, E. H., McCann, R. S., Hoch, M. C., & Cramer, R. J. (2020). An intervention based on the health belief model led to improvements in self-efficacy towards ERIPP participation and functional performance in club sport athletes: a pilot study. <i>Journal of Science &amp; Medicine in Sport</i> , 23(10), 921–926.                                                          |
| Search.Two | 2  | Sivrikaya, M. H. (2018). The Role of Self-Efficacy on Performance of Sports Skills of Football Players. <i>Journal of Education and Training Studies</i> , 6, 75–79.                                                                                                                                                                                                                  |
| Search.Two | 3  | Coudeville, G. R., Ginis, K. A. M., & Famose, J.-P. (2008). Determinants of self-handicapping strategies in sport and their effects on athletic performance. <i>Social Behavior and</i>                                                                                                                                                                                               |

|            |    |                                                                                                                                                                                                                                                                                                                                                                                          |
|------------|----|------------------------------------------------------------------------------------------------------------------------------------------------------------------------------------------------------------------------------------------------------------------------------------------------------------------------------------------------------------------------------------------|
|            |    | Personality: An International Journal, 36(3), 391–398.<br><a href="https://doi-org.lib-e2.lib.ttu.edu/10.2224/sbp.2008.36.3.391">https://doi-org.lib-e2.lib.ttu.edu/10.2224/sbp.2008.36.3.391</a>                                                                                                                                                                                        |
| Search.Two | 4  | Wilhelm, A., Büsch, D., & Pabst, J. (2013). Sportspielspezifische Wirksamkeitserwartungen im Nachwuchsleistungshandball = Sport-game specific self-efficacy beliefs in handball. Zeitschrift Für Sportpsychologie, 20(4), 137–149. <a href="https://doi-org.lib-e2.lib.ttu.edu/10.1026/1612-5010/a000104">https://doi-org.lib-e2.lib.ttu.edu/10.1026/1612-5010/a000104</a>               |
| Search.Two | 5  | Ortiz Romero, M. T., Garrido Guzmán, M. E., & Castañeda Vázquez, C. (2022). Autoeficacia y resiliencia: diferencias entre deportistas practicantes de fitness/culturismo y no deportistas. / Self-efficacy and resilience: differences between fitness/bodybuilding athletes and nonathletes. Retos: Nuevas Perspectivas de Educación Física, Deporte y Recreación, 44, 232–241.         |
| Search.Two | 6  | Stonecypher, J. M., Blom, L. C., Johnson, J. E., Bolin, J. H., & Hilliard, R. C. (2019). Interdependent tripartite efficacy perceptions and individual performance: Case study of a boys' basketball team. Psychological Reports, 122(2), 645–669. <a href="https://doi-org.lib-e2.lib.ttu.edu/10.1177/0033294118761045">https://doi-org.lib-e2.lib.ttu.edu/10.1177/0033294118761045</a> |
| Search.Two | 7  | Sklett, V. H., Lorås, H. W., & Sigmundsson, H. (2018). Self-efficacy, flow, affect, worry and performance in elite World Cup ski jumping. Frontiers in Psychology, 9. <a href="https://doi-org.lib-e2.lib.ttu.edu/10.3389/fpsyg.2018.01215">https://doi-org.lib-e2.lib.ttu.edu/10.3389/fpsyg.2018.01215</a>                                                                              |
| Search.Two | 8  | Molina, V. M., Oriol, X., & Mendoza, M. C. (2018). Emotional regulation and physical recovery in young athletes of individual and collective sport modalities. / Regulación emocional y recuperación física de los jóvenes deportistas en modalidades deportivas individual y colectiva. RICYDE. Revista Internacional de Ciencias Del Deporte, 14(53), 191–204.                         |
| Search.Two | 9  | Hepler, T. J., & Chase, M. A. (2008). Relationship between decision-making self-efficacy, task self-efficacy, and the performance of a sport skill. Journal of Sports Sciences, 26(6), 603–610. <a href="https://doi-org.lib-e2.lib.ttu.edu/10.1080/02640410701654280">https://doi-org.lib-e2.lib.ttu.edu/10.1080/02640410701654280</a>                                                  |
| Search.Two | 10 | Sallen, J., Hemming, K., & Richartz, A. (2018). Facilitating dual careers by improving resistance to chronic stress: effects of an intervention programme for elite student athletes. European Journal of Sport Science, 18(1), 112–122.                                                                                                                                                 |
| Search.Two | 11 | PIERPAOLO, L., & ANTONIA, T. G. (2018). The psychological constructs and dimensions applied to sports performance: a change of theoretical paradigms. Journal of Physical Education & Sport, 18, 2034–2038.                                                                                                                                                                              |
| Search.Two | 12 | LaForge-MacKenzie, K., & Sullivan, P. J. (2014). The relationship between self-efficacy and performance within a                                                                                                                                                                                                                                                                         |

|            |    |                                                                                                                                                                                                                                                                                                                                                                                                                                                            |
|------------|----|------------------------------------------------------------------------------------------------------------------------------------------------------------------------------------------------------------------------------------------------------------------------------------------------------------------------------------------------------------------------------------------------------------------------------------------------------------|
|            |    | continuous educational gymnastics routine. <i>International Journal of Sport and Exercise Psychology</i> , 12(3), 206–217. <a href="https://doi-org.lib-e2.lib.ttu.edu/10.1080/1612197X.2014.909511">https://doi-org.lib-e2.lib.ttu.edu/10.1080/1612197X.2014.909511</a>                                                                                                                                                                                   |
| Search.Two | 13 | Teques, P., Calmeiro, L., Rosado, A., Silva, C., & Serpa, S. (2019). Perceptions of parenting practices and psychological variables of elite and sub-elite youth athletes. <i>Frontiers in Psychology</i> , 10. <a href="https://doi-org.lib-e2.lib.ttu.edu/10.3389/fpsyg.2019.01495">https://doi-org.lib-e2.lib.ttu.edu/10.3389/fpsyg.2019.01495</a>                                                                                                      |
| Search.Two | 14 | Kolovelonis, A. (2019). Relating Students' Participation in Sport out of School and Performance Calibration in Physical Education. <i>Issues in Educational Research</i> , 29(3), 774–789.                                                                                                                                                                                                                                                                 |
| Search.Two | 15 | Hutchinson, J. C., Sherman, T., Martinovic, N., & Tenenbaum, G. (2008). The effect of manipulated self-efficacy on perceived and sustained effort. <i>Journal of Applied Sport Psychology</i> , 20(4), 457–472. <a href="https://doi-org.lib-e2.lib.ttu.edu/10.1080/10413200802351151">https://doi-org.lib-e2.lib.ttu.edu/10.1080/10413200802351151</a>                                                                                                    |
| Search.Two | 16 | Turner, M. J., Jones, M. V., Sheffield, D., Slater, M. J., Barker, J. B., & Bell, J. J. (2013). Who thrives under pressure? Predicting the performance of elite academy cricketers using the cardiovascular indicators of challenge and threat states. <i>Journal of Sport &amp; Exercise Psychology</i> , 35(4), 387–397. <a href="https://doi-org.lib-e2.lib.ttu.edu/10.1123/jsep.35.4.387">https://doi-org.lib-e2.lib.ttu.edu/10.1123/jsep.35.4.387</a> |
| Search.Two | 17 | Rouquette, O. Y., Knight, C. J., Lovett, V. E., & Heuzé, J.-P. (2021). The influence of perceived parental responsiveness on athletes' goal accomplishment, trait cognitive sport anxiety, and thriving: A semi-longitudinal study. <i>Psychology of Sport &amp; Exercise</i> , 57, N.PAG.                                                                                                                                                                 |
| Search.Two | 18 | Haney, C. J., & Long, B. C. (1995). Coping effectiveness: a path analysis of self-efficacy, control, coping, and performance in sport competitions. <i>Journal of Applied Social Psychology</i> , 25, 1726–1746.                                                                                                                                                                                                                                           |
| Search.Two | 19 | Perkins, N. (2018). Positive Impact of Participation in Wheelchair Rugby: A Review of the Literature. <i>Palaestra</i> , 32(2), 18–22.                                                                                                                                                                                                                                                                                                                     |
| Search.Two | 20 | Watkins, B., Garcia, A. W., & Turek, E. (1994). The relation between self-efficacy and sport performance: evidence from a sample of youth baseball players. / La relation entre l'efficacité et la performance sportive - analyse a partir d'un échantillon de jeunes joueurs de baseball. <i>Journal of Applied Sport Psychology</i> , 6(1), 21–31.                                                                                                       |
| Search.Two | 21 | Sarrazin, P., & Famose, J.-P. (2005). Plus c'est difficile et mieux je réussis! Étude des liens entre les buts fixés, l'efficacité personnelle et la performance sportive = It is difficult and I am afraid to fail! Study of the relation among fixed goals, personal efficacy, and sports performance.                                                                                                                                                   |

|            |    |                                                                                                                                                                                                                                                                                                                                    |
|------------|----|------------------------------------------------------------------------------------------------------------------------------------------------------------------------------------------------------------------------------------------------------------------------------------------------------------------------------------|
|            |    | Bulletin de Psychologie, 58(1), 107–111. <a href="https://doi-org.lib-e2.lib.ttu.edu/10.3917/bupsy.475.0107">https://doi-org.lib-e2.lib.ttu.edu/10.3917/bupsy.475.0107</a>                                                                                                                                                         |
| Search.Two | 22 | RINTAUGU, E. G., MWANGI, F. M., & TORIOLA, A. L. (2018). Sources of sports confidence and contextual factors among university athletes. <i>Journal of Physical Education &amp; Sport</i> , 18(2), 889–895.                                                                                                                         |
| Search.Two | 23 | Barker, J. B., Jones, M. V., & Greenlees, I. (2013). Using hypnosis to enhance self-efficacy in sport performers. <i>Journal of Clinical Sport Psychology</i> , 7(3), 228–247. <a href="https://doi-org.lib-e2.lib.ttu.edu/10.1123/jcsp.7.3.228">https://doi-org.lib-e2.lib.ttu.edu/10.1123/jcsp.7.3.228</a>                       |
| Search.Two | 24 | Pettit, J. A., & Karageorghis, C. I. (2020). Effects of video, priming, and music on motivation and self-efficacy in American football players. <i>International Journal of Sports Science &amp; Coaching</i> , 15(5/6), 685–695.                                                                                                  |
| Search.Two | 25 | Slobounov, S., Yukelson, D., & O'Brien, R. (1997). Self-efficacy and movement variability of Olympic-level springboard divers. <i>Journal of Applied Sport Psychology</i> , 9(2), 171–190. <a href="https://doi-org.lib-e2.lib.ttu.edu/10.1080/10413209708406480">https://doi-org.lib-e2.lib.ttu.edu/10.1080/10413209708406480</a> |
| Search.Two | 26 | Winfrey, M. L., & Weeks, D. L. (1993). Effects of self-modeling on self-efficacy and balance beam performance. <i>Perceptual and Motor Skills</i> , 77(3, Pt 1), 907–913. <a href="https://doi-org.lib-e2.lib.ttu.edu/10.2466/pms.1993.77.3.907">https://doi-org.lib-e2.lib.ttu.edu/10.2466/pms.1993.77.3.907</a>                  |
| Search.Two | 27 | Gouvêa, F. C. (2003). Análise Da Auto-Eficácia Em Atletas De Modalidades Individuais E Coletivas. / Analysis of the Self-Efficacy in Athletes of Individual and Collective Modalities. <i>Revista Mackenzie de Educacao Fisica e Esporte</i> , 2(2), 45–59.                                                                        |
| Search.Two | 28 | Horcajo J, Santos D, Higuero G. The effects of self-efficacy on physical and cognitive performance: An analysis of meta-certainty. <i>Psychology of Sport and Exercise</i> . 2022;58. doi:10.1016/j.psychsport.2021.102063                                                                                                         |
| Search.Two | 29 | Law, B., & Ste-Marie, D. M. (2005). Effects of self-modeling on figure skating jump performance and psychological variables. <i>European Journal of Sport Science</i> , 5(3), 143–152. <a href="https://doi-org.lib-e2.lib.ttu.edu/10.1080/17461390500159273">https://doi-org.lib-e2.lib.ttu.edu/10.1080/17461390500159273</a>     |
| Search.Two | 30 | Irazusta, S., & Arruza, J. (2006). Influencia de Variables Psicológicas en el Rendimiento de Jugadores Amateurs de Golf = The Influence of Psychological Variables on Amateur Golfers' Performance. <i>Revista de Psicología Del Deporte</i> , 15(1), 127–138.                                                                     |
| Search.Two | 31 | Iaochite, R. T., & Vieira, R. R. (2013). Autoeficácia De Técnicos Esportivos: Um Estudo Exploratório1. / Coach Self-Efficacy: An Exploratory Study. <i>Revista Mackenzie de Educacao Fisica e Esporte</i> , 12(1), 79–94.                                                                                                          |
| Search.Two | 32 | Blecharz, J., Luszczynska, A., Tenenbaum, G., Scholz, U., & Cieslak, R. (2014). Self-efficacy moderates but collective                                                                                                                                                                                                             |

|            |    |                                                                                                                                                                                                                                                                                                                                                                                                                                                  |
|------------|----|--------------------------------------------------------------------------------------------------------------------------------------------------------------------------------------------------------------------------------------------------------------------------------------------------------------------------------------------------------------------------------------------------------------------------------------------------|
|            |    | efficacy mediates between motivational climate and athletes' well-being. <i>Applied Psychology: Health and Well-Being</i> , 6(3), 280–299. <a href="https://doi-org.lib-e2.lib.ttu.edu/10.1111/aphw.12028">https://doi-org.lib-e2.lib.ttu.edu/10.1111/aphw.12028</a>                                                                                                                                                                             |
| Search.Two | 33 | Aldous-Granby, J., & McCormick, A. (2020). Effects of clothing perception on psychological factors and tactical intentions in fencing. <i>International Journal of Sport &amp; Exercise Psychology</i> , 18(3), 380–390.                                                                                                                                                                                                                         |
| Search.Two | 34 | Lane, A. M., Hall, R., & Lane, J. (2004). Self-Efficacy and Statistics Performance among Sport Studies Students. <i>Teaching in Higher Education</i> , 9(4), 435–448.                                                                                                                                                                                                                                                                            |
| Search.Two | 35 | Stidwill, H. F. (1994). Application of self-efficacy theory: A treatment approach for sport performance phobias. <i>Journal of Mental Health Counseling</i> , 16(2), 196–204.                                                                                                                                                                                                                                                                    |
| Search.Two | 36 | González, J., & Garcés de los Fayos, E. J. (2014). Diferencias individuales e indicadores de ansiedad como estrategias adaptativas de autoeficacia en el deportista = Individual differences and indicators of anxiety as adaptive strategies of self-efficacy in athletes. <i>Ansiedad y Estrés</i> , 20(1), 51–59.                                                                                                                             |
| Search.Two | 37 | Saville, P. D., Bray, S. R., Ginis, K. A. M., Cairney, J., Marinoff-Shupe, D., & Pettit, A. (2014). Sources of self-efficacy and coach/instructor behaviors underlying relation-inferred self-efficacy (RISE) in recreational youth sport. <i>Journal of Sport &amp; Exercise Psychology</i> , 36(2), 146–156. <a href="https://doi-org.lib-e2.lib.ttu.edu/10.1123/jsep.2013-0144">https://doi-org.lib-e2.lib.ttu.edu/10.1123/jsep.2013-0144</a> |
| Search.Two | 38 | Blecharz, J., Horodyska, K., Zarychta, K., Adamiec, A., & Luszczynska, A. (2015). Intrinsic motivation predicting performance satisfaction in athletes: Further psychometric evaluations of the Sport Motivation Scale-6. <i>Polish Psychological Bulletin</i> , 46(2), 309–319.                                                                                                                                                                 |
| Search.Two | 39 | ESTEVAN, I., ÁLVAREZ, O., FALCÓ, C., & CASTILLO, I. (2014). Self-efficacy and performance of the roundhouse kick in taekwondo. / Autoeficacia y rendimiento en la patada circular de taekwondo. <i>Revista de Artes Marciales Asiaticas</i> , 9(2), 97–105.                                                                                                                                                                                      |
| Search.Two | 40 | Samson, A. (2014). Sources of self-efficacy during marathon training: A qualitative, longitudinal investigation. <i>The Sport Psychologist</i> , 28(2), 164–175. <a href="https://doi-org.lib-e2.lib.ttu.edu/10.1123/tsp.2013-0027">https://doi-org.lib-e2.lib.ttu.edu/10.1123/tsp.2013-0027</a>                                                                                                                                                 |
| Search.Two | 41 | HEAZLEWOOD, I., & BURKE, S. (2011). Self-efficacy and its relationship to selected sport psychological constructs in the prediction of performance in ironman triathlon. <i>Journal of Human Sport &amp; Exercise</i> , 6(2), 328–350.                                                                                                                                                                                                           |
| Search.Two | 42 | Yang, Z. (2020). An empirical analysis of the relationship between self-efficacy, motivation, and team performance of high-level basketball players. <i>Revista de Psicología Del Deporte</i> , 29(4), 221–231.                                                                                                                                                                                                                                  |

|            |    |                                                                                                                                                                                                                                                                                                                                                                                    |
|------------|----|------------------------------------------------------------------------------------------------------------------------------------------------------------------------------------------------------------------------------------------------------------------------------------------------------------------------------------------------------------------------------------|
| Search.Two | 43 | Turner, M. J., Massie, R., Slater, M. J., & Braithwaite, E. (2021). Do challenge and threat evaluations predict netball performance and selection at trials in youth netball players? <i>Sport, Exercise, and Performance Psychology</i> , 10(1), 71–87. <a href="https://doi-org.lib-e2.lib.ttu.edu/10.1037/spy0000248">https://doi-org.lib-e2.lib.ttu.edu/10.1037/spy0000248</a> |
| Search.Two | 44 | Fiander, M. F., Jones, M. I., & Parker, J. K. (2018). An exploration of game-strategy efficacy beliefs in UK youth sport coaches. <i>Sport &amp; Exercise Psychology Review</i> , 14(1), 33–46.                                                                                                                                                                                    |
| Search.Two | 45 | Jonker, L., Elferink-Gemser, M., Toering, T., Lyons, J., & Visscher, C. (2010). Academic performance and self-regulatory skills in elite youth soccer players. <i>Journal of Sports Sciences</i> , 28(14), 1605–1614.                                                                                                                                                              |
| Search.Two | 46 | Beattie, S., Lief, D., Adamoulas, M., & Oliver, E. (2011). Investigating the possible negative effects of self-efficacy upon golf putting performance. <i>Psychology of Sport and Exercise</i> , 12(4), 434–441. <a href="https://doi-org.lib-e2.lib.ttu.edu/10.1016/j.psychsport.2011.02.004">https://doi-org.lib-e2.lib.ttu.edu/10.1016/j.psychsport.2011.02.004</a>             |
| Search.Two | 47 | McCormick, A., Meijen, C., & Marcora, S. (2015). Psychological determinants of whole-body endurance performance. <i>Sports Medicine</i> , 45(7), 997–1015. <a href="https://doi-org.lib-e2.lib.ttu.edu/10.1007/s40279-015-0319-6">https://doi-org.lib-e2.lib.ttu.edu/10.1007/s40279-015-0319-6</a>                                                                                 |
| Search.Two | 48 | Estevan, I., Álvarez, O., & Castillo, I. (2016). Autoeficacia percibida y rendimiento técnico-táctico en taekwondistas universitarios = Perceived self-efficacy and technical-tactical performance in university taekwondo athletes. <i>Cuadernos de Psicología Del Deporte</i> , 16(2), 51–64.                                                                                    |
| Search.Two | 49 | Barker, J. B., & Jones, M. V. (2008). The effects of hypnosis on self-efficacy, affect, and soccer performance: A case study. <i>Journal of Clinical Sport Psychology</i> , 2(2), 127–147.                                                                                                                                                                                         |
| Search.Two | 50 | Stander, F. W., Rothmann, S., & Botha, E. (2015). The role of teammate relationships, communication and self-efficacy in predicting athlete flow experience. <i>Journal of Psychology in Africa</i> , 25(6), 494–503.                                                                                                                                                              |
| Search.Two | 51 | Habeeb, C. M., Eklund, R. C., & Coffee, P. (2017). It depends on the partner: Person-related sources of efficacy beliefs and performance for athlete pairs. <i>Journal of Sport &amp; Exercise Psychology</i> , 39(3), 172–187. <a href="https://doi-org.lib-e2.lib.ttu.edu/10.1123/jsep.2016-0348">https://doi-org.lib-e2.lib.ttu.edu/10.1123/jsep.2016-0348</a>                  |
| Search.Two | 52 | Weigand, D. A., & Stockham, K. J. (2000). The importance of analyzing position-specific self-efficacy. <i>Journal of Sport Behavior</i> , 23(1), 61–69.                                                                                                                                                                                                                            |
| Search.Two | 53 | Cohen, A. B., Tenenbaum, G., & English, R. W. (2006). Emotions and Golf Performance: An IZOF-Based Applied Sport Psychology Case Study. <i>Behavior Modification</i> , 30(3), 259–280. <a href="https://doi-org.lib-e2.lib.ttu.edu/10.1177/0145445503261174">https://doi-org.lib-e2.lib.ttu.edu/10.1177/0145445503261174</a>                                                       |

|            |    |                                                                                                                                                                                                                                                                                                                                                                                                                                                |
|------------|----|------------------------------------------------------------------------------------------------------------------------------------------------------------------------------------------------------------------------------------------------------------------------------------------------------------------------------------------------------------------------------------------------------------------------------------------------|
| Search.Two | 54 | Leirdal, S., Sandbakk, Ø., & Ettema, G. (2013). Effects of frequency on gross efficiency and performance in roller ski skating. <i>Scandinavian Journal of Medicine &amp; Science in Sports</i> , 23(3), 295–302. <a href="https://doi-org.lib-e2.lib.ttu.edu/10.1111/j.1600-0838.2011.01379.x">https://doi-org.lib-e2.lib.ttu.edu/10.1111/j.1600-0838.2011.01379.x</a>                                                                        |
| Search.Two | 55 | May, K. H., Guccione, A. A., Edwards, M. C., & Goldstein, M. S. (2016). The Adolescent Measure of Confidence and Musculoskeletal Performance (Amcamp): Development and Initial Validation. <i>International Journal of Sports Physical Therapy</i> , 11(5), 698–707.                                                                                                                                                                           |
| Search.Two | 56 | Martin, J. J. (2002). Training and performance self-efficacy, affect, and performance in wheelchair road racers. <i>The Sport Psychologist</i> , 16(4), 384–395.                                                                                                                                                                                                                                                                               |
| Search.Two | 57 | Kingsley, M., Russell, M., & Benton, D. (2012). Authors' response to letter to the Editor: "The need for 'representative task design' in evaluating efficacy of skills tests in sport: A comment on Russell, Benton and Kingsley (2010)." <i>Journal of Sports Sciences</i> , 30(16), 1731–1733. <a href="https://doi-org.lib-e2.lib.ttu.edu/10.1080/02640414.2012.723134">https://doi-org.lib-e2.lib.ttu.edu/10.1080/02640414.2012.723134</a> |
| Search.Two | 58 | Öncü, E., Feltz, D. L., Lirgg, C. D., & Gürbüz, B. (2018). The examination of the psychometric properties of the Turkish Collective Efficacy Questionnaire for Sports. <i>Acta Gymnica</i> , 48(1), 27–35.                                                                                                                                                                                                                                     |
| Search.Two | 59 | Jackson, B., & Beauchamp, M. R. (2007). Self-efficacy and performance in athlete dyads: Evidence of actor and partner effects. <i>Journal of Sport &amp; Exercise Psychology</i> , 29, S173.                                                                                                                                                                                                                                                   |
| Search.Two | 60 | Law, B., & Hall, C. (2009). Observational learning use and self-efficacy beliefs in adult sport novices. <i>Psychology of Sport and Exercise</i> , 10(2), 263–270. <a href="https://doi-org.lib-e2.lib.ttu.edu/10.1016/j.psychsport.2008.08.003">https://doi-org.lib-e2.lib.ttu.edu/10.1016/j.psychsport.2008.08.003</a>                                                                                                                       |
| Search.Two | 61 | Morris, R. L., & Kavussanu, M. (2008). Antecedents of approach-avoidance goals in sport. <i>Journal of Sports Sciences</i> , 26(5), 465–476. <a href="https://doi-org.lib-e2.lib.ttu.edu/10.1080/02640410701579388">https://doi-org.lib-e2.lib.ttu.edu/10.1080/02640410701579388</a>                                                                                                                                                           |
| Search.Two | 62 | Dallmann, P., Bach, C., Zipser, H., Thomann, P. A., & Herpertz, S. C. (2016). Evaluation of a stress prevention program for young high-performance athletes. <i>Mental Health and Prevention</i> , 4(2), 75–80. <a href="https://doi-org.lib-e2.lib.ttu.edu/10.1016/j.mhp.2016.04.001">https://doi-org.lib-e2.lib.ttu.edu/10.1016/j.mhp.2016.04.001</a>                                                                                        |
| Search.Two | 63 | Hofseth, E., Toering, T., Jordet, G., & Ivarsson, A. (2017). Self-evaluation of skills and performance level in youth elite soccer: Are positive self-evaluations always positive? <i>Sport, Exercise, and Performance Psychology</i> , 6(4), 370–383. <a href="https://doi-org.lib-e2.lib.ttu.edu/10.1037/spy0000094">https://doi-org.lib-e2.lib.ttu.edu/10.1037/spy0000094</a>                                                               |

|            |    |                                                                                                                                                                                                                                                                                                                                                                                                                           |
|------------|----|---------------------------------------------------------------------------------------------------------------------------------------------------------------------------------------------------------------------------------------------------------------------------------------------------------------------------------------------------------------------------------------------------------------------------|
| Search.Two | 64 | Ram, N., & McCullagh, P. (2003). Self-modeling: Influence on psychological responses and physical performance. <i>The Sport Psychologist</i> , 17(2), 220–241.                                                                                                                                                                                                                                                            |
| Search.Two | 65 | Vasconcelos-Raposo, J. J. B., & Carvalho, R. (2000). Ansiedad cognitiva, somática y autoconfianza en árbitros de balonvolea = Cognitive and somatic anxiety, and self-efficacy in volleyball officials. <i>Revista de Psicología Del Deporte</i> , 9(1–2), 135–142.                                                                                                                                                       |
| Search.Two | 66 | Beauchamp, M. R., Bray, S. R., & Albinson, J. G. (2002). Pre-competition imagery, self-efficacy and performance in collegiate golfers. <i>Journal of Sports Sciences</i> , 20(9), 697–705.                                                                                                                                                                                                                                |
| Search.Two | 67 | Bortoli, L., Bertollo, M., Comani, S., & Robazza, C. (2011). Competence, achievement goals, motivational climate, and pleasant psychobiosocial states in youth sport. <i>Journal of Sports Sciences</i> , 29(2), 171–180. <a href="https://doi-org.lib-e2.lib.ttu.edu/10.1080/02640414.2010.530675">https://doi-org.lib-e2.lib.ttu.edu/10.1080/02640414.2010.530675</a>                                                   |
| Search.Two | 68 | Miles, A., & Neil, R. (2013). The use of self-talk during elite cricket batting performance. <i>Psychology of Sport and Exercise</i> , 14(6), 874–881. <a href="https://doi-org.lib-e2.lib.ttu.edu/10.1016/j.psychsport.2013.07.005">https://doi-org.lib-e2.lib.ttu.edu/10.1016/j.psychsport.2013.07.005</a>                                                                                                              |
| Search.Two | 69 | Otter, R. T. A., Brink, M. S., van der Does, H. T. D., & Lemmink, K. A. P. M. (2016). Monitoring Perceived Stress and Recovery in Relation to Cycling Performance in Female Athletes. <i>International Journal of Sports Medicine</i> , 37(1), 12–18.                                                                                                                                                                     |
| Search.Two | 70 | Wurtele, S. K. (1986). Self-efficacy and athletic performance: A review. <i>Journal of Social and Clinical Psychology</i> , 4(3), 290–301. <a href="https://doi-org.lib-e2.lib.ttu.edu/10.1521/jscp.1986.4.3.290">https://doi-org.lib-e2.lib.ttu.edu/10.1521/jscp.1986.4.3.290</a>                                                                                                                                        |
| Search.Two | 71 | Ramires, A., Carapeta, C., Felgueiras, F., & Viana, M. F. (2001). Treino de modelagem e visualização mental: Avaliação dos efeitos nas expectativas de auto-eficácia e desempenho de atletas de patinagem = Training in modeling and mental visualization: Evaluation of the effects of expectations on self-efficacy and performance of skating athletes. <i>Análise Psicológica</i> , 19(1), 15–25.                     |
| Search.Two | 72 | Fransen, K., Steffens, N. K., Haslam, S. A., Vanbeselaere, N., Vande Broek, G., & Boen, F. (2016). We will be champions: Leaders' confidence in 'us' inspires team members' team confidence and performance. <i>Scandinavian Journal of Medicine &amp; Science in Sports</i> , 26(12), 1455–1469. <a href="https://doi-org.lib-e2.lib.ttu.edu/10.1111/sms.12603">https://doi-org.lib-e2.lib.ttu.edu/10.1111/sms.12603</a> |
| Search.Two | 73 | Boardley, I. D., Kavussanu, M., & Ring, C. (2008). Athletes' perceptions of coaching effectiveness and athlete-related outcomes in rugby union: An investigation based on the coaching efficacy model. <i>The Sport Psychologist</i> , 22(3), 269–287.                                                                                                                                                                    |



|            |    |                                                                                                                                                                                                                                                                                                                                                                                                       |
|------------|----|-------------------------------------------------------------------------------------------------------------------------------------------------------------------------------------------------------------------------------------------------------------------------------------------------------------------------------------------------------------------------------------------------------|
| Search.Two | 74 | Christensen, D. S., & Smith, R. E. (2016). Psychological coping skills as predictors of collegiate golf performance: Social desirability as a suppressor variable. <i>Sport, Exercise, and Performance Psychology</i> , 5(1), 67–80. <a href="https://doi-org.lib-e2.lib.ttu.edu/10.1037/spy0000049">https://doi-org.lib-e2.lib.ttu.edu/10.1037/spy0000049</a>                                        |
| Search.Two | 75 | Cockerill, I. M., Pyle, H. J., & Read, S. (1996). <i>The self-efficacy/self-esteem relationship in sport and at work</i> . <i>Employee Counselling Today</i> , 8(4), 19–23. <a href="https://doi-org.lib-e2.lib.ttu.edu/10.1108/13665629610121632">https://doi-org.lib-e2.lib.ttu.edu/10.1108/13665629610121632</a>                                                                                   |
| Search.Two | 76 | Coffee, P., & Rees, T. (2011). When the chips are down: Effects of attributional feedback on self-efficacy and task performance following initial and repeated failure. <i>Journal of Sports Sciences</i> , 29(3), 235–245. <a href="https://doi-org.lib-e2.lib.ttu.edu/10.1080/02640414.2010.531752">https://doi-org.lib-e2.lib.ttu.edu/10.1080/02640414.2010.531752</a>                             |
| Search.Two | 77 | Keeler, L. A., & Watson, J. C., II. (2011). The transtheoretical model and psychological skills training: Application and implications with elite female athletes. <i>Athletic Insight: The Online Journal of Sport Psychology</i> , 3(2), 95–113.                                                                                                                                                    |
| Search.Two | 78 | Gilson, T. A., Chow, G. M., & Feltz, D. L. (2012). Self-efficacy and athletic squat performance: Positive or negative influences at the within- and between-levels of analysis. <i>Journal of Applied Social Psychology</i> , 42(6), 1467–1485. <a href="https://doi-org.lib-e2.lib.ttu.edu/10.1111/j.1559-1816.2012.00908.x">https://doi-org.lib-e2.lib.ttu.edu/10.1111/j.1559-1816.2012.00908.x</a> |
| Search.Two | 79 | Brown, L. J., Malouff, J. M., & Schutte, N. S. (2005). The Effectiveness of a Self-Efficacy Intervention for Helping Adolescents Cope with Sport-Competition Loss. <i>Journal of Sport Behavior</i> , 28(2), 136–150.                                                                                                                                                                                 |
| Search.Two | 80 | Gernigon, C., & Delloye, J.-B. (2003). Self-efficacy, causal attribution, and track athletic performance following unexpected success or failure among elite sprinters. <i>The Sport Psychologist</i> , 17(1), 55–76.                                                                                                                                                                                 |
| Search.Two | 81 | Hatzigeorgiadis, A., Zourbanos, N., Goltsios, C., & Theodorakis, Y. (2008). Investigating the functions of self-talk: The effects of motivational self-talk on self-efficacy and performance in young tennis players. <i>The Sport Psychologist</i> , 22(4), 458–471.                                                                                                                                 |
| Search.Two | 82 | Dodge, T., & Jaccard, J. J. (2008). Is abstinence an alternative? Predicting adolescent athletes' intentions to use performance enhancing substances. <i>Journal of Health Psychology</i> , 13(5), 703–711. <a href="https://doi-org.lib-e2.lib.ttu.edu/10.1177/1359105307082460">https://doi-org.lib-e2.lib.ttu.edu/10.1177/1359105307082460</a>                                                     |
| Search.Two | 83 | Lowther, J., Lane, A., & Lane, H. (2002). Self-efficacy and psychological skills during the Amputee Soccer World Cup. <i>Athletic Insight: The Online Journal of Sport Psychology</i> , 4(2).                                                                                                                                                                                                         |

|            |    |                                                                                                                                                                                                                                                                                                                                                                                                                                                                    |
|------------|----|--------------------------------------------------------------------------------------------------------------------------------------------------------------------------------------------------------------------------------------------------------------------------------------------------------------------------------------------------------------------------------------------------------------------------------------------------------------------|
| Search.Two | 84 | Garza, D. L., & Feltz, D. L. (1998). Effects of selected mental practice on performance, self-efficacy, and competition confidence of figure skaters. <i>The Sport Psychologist</i> , 12(1), 1–15.                                                                                                                                                                                                                                                                 |
| Search.Two | 85 | Geisler, G. W. W., & Leith, L. M. (1997). The effects of self-esteem, self-efficacy and audience presence on soccer penalty shot performance. <i>Journal of Sport Behavior</i> , 20(3), 322–337.                                                                                                                                                                                                                                                                   |
| Search.Two | 86 | Blecharz, J., Luszczynska, A., Scholz, U., Schwarzer, R., Siekanska, M., & Cieslak, R. (2014). Predicting performance and performance satisfaction: Mindfulness and beliefs about the ability to deal with social barriers in sport. <i>Anxiety, Stress &amp; Coping: An International Journal</i> , 27(3), 270–287. <a href="https://doi-org.lib-e2.lib.ttu.edu/10.1080/10615806.2013.839989">https://doi-org.lib-e2.lib.ttu.edu/10.1080/10615806.2013.839989</a> |
| Search.Two | 87 | Arias, J. L. (2012). Influence of ball weight on shot accuracy and efficacy among 9-11-year-old male basketball players. <i>Kinesiology</i> , 44(1), 52–59.                                                                                                                                                                                                                                                                                                        |
| Search.Two | 88 | Morton, P. A. (2003). The hypnotic belay in alpine mountaineering: The use of self-hypnosis for the resolution of sports injuries and for performance enhancement. <i>American Journal of Clinical Hypnosis</i> , 46(1), 45–51. <a href="https://doi-org.lib-e2.lib.ttu.edu/10.1080/00029157.2003.10403564">https://doi-org.lib-e2.lib.ttu.edu/10.1080/00029157.2003.10403564</a>                                                                                  |
| Search.Two | 89 | Barkoukis, V., Koidou, E., & Tsorbatzoudis, H. (2010). Effects of a motivational climate intervention on state anxiety, self-efficacy, and skill development in physical education. <i>European Journal of Sport Science</i> , 10(3), 167–177. <a href="https://doi-org.lib-e2.lib.ttu.edu/10.1080/17461390903426634">https://doi-org.lib-e2.lib.ttu.edu/10.1080/17461390903426634</a>                                                                             |
| Search.Two | 90 | Feltz, D. L., & Lirgg, C. D. (1998). Perceived team and player efficacy in hockey. <i>Journal of Applied Psychology</i> , 83(4), 557–564. <a href="https://doi-org.lib-e2.lib.ttu.edu/10.1037/0021-9010.83.4.557">https://doi-org.lib-e2.lib.ttu.edu/10.1037/0021-9010.83.4.557</a>                                                                                                                                                                                |
| Search.Two | 91 | Lohasz, P. G., & Leith, L. M. (1997). The effect of three mental preparation strategies on the performance of a complex response time task. <i>International Journal of Sport Psychology</i> , 28(1), 25–34.                                                                                                                                                                                                                                                       |
| Search.Two | 92 | Kitsantas, A., & Zimmerman, B. J. (2002). Comparing self-regulatory processes among novice, non-expert, and expert volleyball players: A microanalytic study. <i>Journal of Applied Sport Psychology</i> , 14(2), 91–105. <a href="https://doi-org.lib-e2.lib.ttu.edu/10.1080/10413200252907761">https://doi-org.lib-e2.lib.ttu.edu/10.1080/10413200252907761</a>                                                                                                  |
| Search.Two | 93 | Wilson, M., & Smith, N. C. (2007). A test of the predictions of processing efficiency theory during elite team competition using the Thought Occurrence Questionnaire                                                                                                                                                                                                                                                                                              |

|            |     |                                                                                                                                                                                                                                                                                                                                                                      |
|------------|-----|----------------------------------------------------------------------------------------------------------------------------------------------------------------------------------------------------------------------------------------------------------------------------------------------------------------------------------------------------------------------|
|            |     | for Sport. <i>International Journal of Sport Psychology</i> , 38(3), 245–262.                                                                                                                                                                                                                                                                                        |
| Search.Two | 94  | Kalasountas, V., Reed, J., & Fitzpatrick, J. (2007). The effect of placebo-induced changes in expectancies on maximal force production in college students. <i>Journal of Applied Sport Psychology</i> , 19(1), 116–124. <a href="https://doi-org.lib-e2.lib.ttu.edu/10.1080/10413200601123736">https://doi-org.lib-e2.lib.ttu.edu/10.1080/10413200601123736</a>     |
| Search.Two | 95  | McCarthy, P. J. (2011). Positive emotion in sport performance: Current status and future directions. <i>International Review of Sport and Exercise Psychology</i> , 4(1), 50–69. <a href="https://doi-org.lib-e2.lib.ttu.edu/10.1080/1750984X.2011.560955">https://doi-org.lib-e2.lib.ttu.edu/10.1080/1750984X.2011.560955</a>                                       |
| Search.Two | 96  | Edwards, C., Tod, D., & McGuigan, M. (2008). Self-talk influences vertical jump performance and kinematics in male rugby union players. <i>Journal of Sports Sciences</i> , 26(13), 1459–1465. <a href="https://doi-org.lib-e2.lib.ttu.edu/10.1080/02640410802287071">https://doi-org.lib-e2.lib.ttu.edu/10.1080/02640410802287071</a>                               |
| Search.Two | 97  | Myers, N. D., Payment, C. A., & Feltz, D. L. (2004). Reciprocal Relationships Between Collective Efficacy and Team Performance in Women's Ice Hockey. <i>Group Dynamics: Theory, Research, and Practice</i> , 8(3), 182–195. <a href="https://doi-org.lib-e2.lib.ttu.edu/10.1037/1089-2699.8.3.182">https://doi-org.lib-e2.lib.ttu.edu/10.1037/1089-2699.8.3.182</a> |
| Search.Two | 98  | Theodorakis, Y., Weinberg, R., Natsis, P., Douma, I., & Kazakas, P. (2000). The effects of motivational versus instructional self-talk on improving motor performance. <i>The Sport Psychologist</i> , 14(3), 253–271.                                                                                                                                               |
| Search.Two | 99  | Sánchez, X., & Torregrosa, M. (2005). El papel de los factores psicológicos en la escalada deportiva: Un análisis cualitativo = The influence of psychological factors on sport performance. <i>Revista de Psicología Del Deporte</i> , 14(2), 177–194.                                                                                                              |
| Search.Two | 100 | Musculus, L., Raab, M., Belling, P., & Lobinger, B. (2018). Linking self-efficacy and decision-making processes in developing soccer players. <i>Psychology of Sport &amp; Exercise</i> , 39, 72–80.                                                                                                                                                                 |
| Search.Two | 101 | Martínez-Romero, M., Molina, V. M., & Oriol-Granado, X. (2016). Desarrollo y validación del cuestionario de autoconfianza en competición CACD para deportes individuales y colectivos = Development and validation of questionnaire CAD confidence in competition for individual and team sports. <i>Cuadernos de Psicología Del Deporte</i> , 16(2), 13–20.         |
| Search.Two | 102 | Schinke, R. J., & da Costa, J. L. (2001). A plausible relationship between support-infrastructure and major-games athletic performance. <i>Athletic Insight: The Online Journal of Sport Psychology</i> , 3(2).                                                                                                                                                      |

|            |     |                                                                                                                                                                                                                                                                                                                                                                                                                     |
|------------|-----|---------------------------------------------------------------------------------------------------------------------------------------------------------------------------------------------------------------------------------------------------------------------------------------------------------------------------------------------------------------------------------------------------------------------|
| Search.Two | 103 | Moll, T., Rees, T., & Freeman, P. (2017). Enacted support and golf-putting performance: The role of support type and support visibility. <i>Psychology of Sport and Exercise</i> , 30, 30–37. <a href="https://doi-org.lib-e2.lib.ttu.edu/10.1016/j.psychsport.2017.01.007">https://doi-org.lib-e2.lib.ttu.edu/10.1016/j.psychsport.2017.01.007</a>                                                                 |
| Search.Two | 104 | SHERIDAN, A., MARCHANT, D. C., WILLIAMS, E. L., JONES, H. S., HEWITT, P. A., & SPARKS, A. (2019). Presence of Spotters Improves Bench Press Performance: A Deception Study. <i>Journal of Strength &amp; Conditioning Research</i> (Lippincott Williams & Wilkins), 33(7), 1755–1761.                                                                                                                               |
| Search.Two | 105 | Adler, A. B., Bliese, P. D., Pickering, M. A., Hammermeister, J., Williams, J., Harada, C., Csoka, L., Holliday, B., & Ohlson, C. (2015). Mental skills training with basic combat training soldiers: A group-randomized trial. <i>Journal of Applied Psychology</i> , 100(6), 1752–1764. <a href="https://doi-org.lib-e2.lib.ttu.edu/10.1037/apl0000021">https://doi-org.lib-e2.lib.ttu.edu/10.1037/apl0000021</a> |
| Search.Two | 106 | CORRION, K., GERNIGON, C., DEBOIS, N., & D'ARRIPE-LONGUEVILLE, F. (2013). Factor validity and Reliability of the Resistive Self-Regulatory Efficacy in Sport Scale (RSRESS) in a French sample. <i>International Journal of Sport Psychology</i> , 44(2), 128–144.                                                                                                                                                  |
| Search.Two | 107 | 引原 有輝, 渡邊 將司, 川勝 佐希, & 石井 好二郎. (2018). 子どもにおける運動・スポーツ活動と運動遊びの意義とはーヘルスアウトカムとの関連から探るー / Benefits of organized sports participation and voluntary outdoor play in children and adolescents based on evidence-related health outcomes. <i>Japanese Journal of Physical Fitness &amp; Sports Medicine</i> , 67(1), 83–98.                                                                                                |
| Search.Two | 108 | Bono, B., & Livi, S. (2016). Motivazione al successo in atleti di élite: applicazione del 2X2 Achievement Goal Framework nel nuoto = Achievement motivation in elite athletes: Application of 2X2 Achievement Goal Framework in swimming. <i>Rassegna Di Psicologia</i> , 33(1), 51–66.                                                                                                                             |
| Search.Two | 109 | Spink, K. S. (1990). Collective efficacy in the sport setting. <i>International Journal of Sport Psychology</i> , 21(4), 380–395.                                                                                                                                                                                                                                                                                   |
| Search.Two | 110 | di Fronso, S., Nakamura, F. Y., Bortoli, L., Robazza, C., & Bertollo, M. (2013). Stress and Recovery Balance in Amateur Basketball Players: Differences by Gender and Preparation Phase. <i>International Journal of Sports Physiology &amp; Performance</i> , 8(6), 618–622.                                                                                                                                       |
| Search.Two | 111 | Sappington, R., & Longshore, K. (2015). Systematically reviewing the efficacy of mindfulness-based interventions for enhanced athletic performance. <i>Journal of Clinical Sport Psychology</i> , 9(3), 232–262. <a href="https://doi-org.lib-e2.lib.ttu.edu/10.1123/jcsp.2014-0017">https://doi-org.lib-e2.lib.ttu.edu/10.1123/jcsp.2014-0017</a>                                                                  |
| Search.Two | 112 | LaForge-MacKenzie, K., & Sullivan, P. J. (2014). A comparison of the self-efficacy-performance relationship                                                                                                                                                                                                                                                                                                         |

|            |     |                                                                                                                                                                                                                                                                                                                                                                                                  |
|------------|-----|--------------------------------------------------------------------------------------------------------------------------------------------------------------------------------------------------------------------------------------------------------------------------------------------------------------------------------------------------------------------------------------------------|
|            |     | between continuous and noncontinuous sport conditions. <i>Journal of Applied Sport Psychology</i> , 26(3), 363–376.<br><a href="https://doi-org.lib-e2.lib.ttu.edu/10.1080/10413200.2014.894154">https://doi-org.lib-e2.lib.ttu.edu/10.1080/10413200.2014.894154</a>                                                                                                                             |
| Search.Two | 113 | Knicker, A. J., Renshaw, I., Oldham, A. R. H., & Cairns, S. P. (2011). Interactive Processes Link the Multiple Symptoms of Fatigue in Sport Competition. <i>Sports Medicine</i> , 41(4), 307–328.                                                                                                                                                                                                |
| Search.Two | 114 | Sit, C. H. P., & Lindner, K. J. (2007). Achievement goal profiles, perceived ability and participation motivation for sport and physical activity. <i>International Journal of Sport Psychology</i> , 38(3), 283–303.                                                                                                                                                                            |
| Search.Two | 115 | Feltz, D. L., & Weiss, M. R. (1982). Developing self-efficacy through sport. <i>Journal of Physical Education, Recreation &amp; Dance</i> , 53(3), 24–26.                                                                                                                                                                                                                                        |
| Search.Two | 116 | Marsh, H. W., Chanal, J. P., & Sarrazin, P. G. (2006). Self-belief does make a difference: A reciprocal effects model of the causal ordering of physical self-concept and gymnastics performance. <i>Journal of Sports Sciences</i> , 24(1), 101–111.<br><a href="https://doi-org.lib-e2.lib.ttu.edu/10.1080/02640410500130920">https://doi-org.lib-e2.lib.ttu.edu/10.1080/02640410500130920</a> |
| Search.Two | 117 | Skjesol, K., & Halvari, H. (2005). Motivational Climate, Achievement Goals, Perceived Sport Competence, and Involvement in Physical Activity: Structural and Mediator Models. <i>Perceptual and Motor Skills</i> , 100(2), 497–523.<br><a href="https://doi-org.lib-e2.lib.ttu.edu/10.2466/PMS.100.2.497-523">https://doi-org.lib-e2.lib.ttu.edu/10.2466/PMS.100.2.497-523</a>                   |
| Search.Two | 118 | Gilbert, W., Dubina, N., & Emmett, M. (2012). “Exploring the potential of assessment efficacy in sports coaching”: A commentary. <i>International Journal of Sports Science &amp; Coaching</i> , 7(2), 211–214. <a href="https://doi-org.lib-e2.lib.ttu.edu/10.1260/1747-9541.7.2.211">https://doi-org.lib-e2.lib.ttu.edu/10.1260/1747-9541.7.2.211</a>                                          |
| Search.Two | 119 | Hay, P., Dickens, S., Crudgington, B., & Engstrom, C. (2012). Exploring the potential of assessment efficacy in sports coaching. <i>International Journal of Sports Science &amp; Coaching</i> , 7(2), 187–198. <a href="https://doi-org.lib-e2.lib.ttu.edu/10.1260/1747-9541.7.2.187">https://doi-org.lib-e2.lib.ttu.edu/10.1260/1747-9541.7.2.187</a>                                          |
| Search.Two | 120 | Burke, S. T., & Jin, P. (1996). Predicting performance from a triathlon event. <i>Journal of Sport Behavior</i> , 19(4), 272–287.                                                                                                                                                                                                                                                                |
| Search.Two | 121 | Reade, I. (2012). “Exploring the potential of assessment efficacy in sports coaching”: A commentary. <i>International Journal of Sports Science &amp; Coaching</i> , 7(2), 199–202.<br><a href="https://doi-org.lib-e2.lib.ttu.edu/10.1260/1747-9541.7.2.199">https://doi-org.lib-e2.lib.ttu.edu/10.1260/1747-9541.7.2.199</a>                                                                   |
| Search.Two | 122 | KING, D., CLARK, T., KELLMANN, M., & HUME, P. A. (2016). Stress and recovery changes of injured and non-injured amateur representative rugby league players over a competition season. <i>New Zealand Journal of Sports Medicine</i> , 43(2), 57–63.                                                                                                                                             |

|            |     |                                                                                                                                                                                                                                                                                                                                                                                                             |
|------------|-----|-------------------------------------------------------------------------------------------------------------------------------------------------------------------------------------------------------------------------------------------------------------------------------------------------------------------------------------------------------------------------------------------------------------|
| Search.Two | 123 | Hay, P., Dickens, S., Crudgington, B., & Engstrom, C. (2012). "Exploring the potential of assessment efficacy in sports coaching": A response to commentaries. <i>International Journal of Sports Science &amp; Coaching</i> , 7(2), 223–226. <a href="https://doi-org.lib-e2.lib.ttu.edu/10.1260/1747-9541.7.2.223">https://doi-org.lib-e2.lib.ttu.edu/10.1260/1747-9541.7.2.223</a>                       |
| Search.Two | 124 | Bueno, J., Weinberg, R. S., Fernández-Castro, J., & Capdevila, L. (2008). <i>Emotional and motivational mechanisms mediating the influence of goal setting on endurance athletes' performance. Psychology of Sport and Exercise</i> , 9(6), 786–799. <a href="https://doi-org.lib-e2.lib.ttu.edu/10.1016/j.psychsport.2007.11.003">https://doi-org.lib-e2.lib.ttu.edu/10.1016/j.psychsport.2007.11.003</a>  |
| Search.Two | 125 | Pineau, T. R., Glass, C. R., Kaufman, K. A., & Bernal, D. R. (2014). Self- and team-efficacy beliefs of rowers and their relation to mindfulness and flow. <i>Journal of Clinical Sport Psychology</i> , 8(2), 142–158. <a href="https://doi-org.lib-e2.lib.ttu.edu/10.1123/jcsp.2014-0019">https://doi-org.lib-e2.lib.ttu.edu/10.1123/jcsp.2014-0019</a>                                                   |
| Search.Two | 126 | Fry, M. D., Guivernau, M., Kim, M., Newton, M., Gano-Overway, L. A., & Magyar, T. M. (2012). Youth perceptions of a caring climate, emotional regulation, and psychological well-being. <i>Sport, Exercise, and Performance Psychology</i> , 1(1), 44–57. <a href="https://doi-org.lib-e2.lib.ttu.edu/10.1037/a0025454">https://doi-org.lib-e2.lib.ttu.edu/10.1037/a0025454</a>                             |
| Search.Two | 127 | Gonzalez-Bono, E., Salvador, A., Ricarte, J., Serrano, M. A., & Arnedo, M. (2000). Testosterone and attribution of successful competition. <i>Aggressive Behavior</i> , 26(3), 235–240. <a href="https://doi-org.lib-e2.lib.ttu.edu/10.1002/(SICI)1098-2337(2000)26:3&lt;235::AID-AB3&gt;3.0.CO;2-L">https://doi-org.lib-e2.lib.ttu.edu/10.1002/(SICI)1098-2337(2000)26:3&lt;235::AID-AB3&gt;3.0.CO;2-L</a> |
| Search.Two | 128 | Capio, C. M., Uiga, L., Lee, M. H., & Masters, R. S. W. (2020). Application of analogy learning in softball batting: Comparing novice and intermediate players. <i>Sport, Exercise, and Performance Psychology</i> , 9(3), 357–370. <a href="https://doi-org.lib-e2.lib.ttu.edu/10.1037/spy0000181">https://doi-org.lib-e2.lib.ttu.edu/10.1037/spy0000181</a>                                               |
| Search.Two | 129 | Gutiérrez, M., & Ruiz, L. M. (2009). Perceived motivational climate, sportsmanship, and students' attitudes toward physical educational classes and teachers. <i>Perceptual and Motor Skills</i> , 108(1), 308–326. <a href="https://doi-org.lib-e2.lib.ttu.edu/10.2466/PMS.108.1.308-326">https://doi-org.lib-e2.lib.ttu.edu/10.2466/PMS.108.1.308-326</a>                                                 |
| Search.Two | 130 | Smith, R. E., Schutz, R. W., Smoll, F. L., & Ptacek, J. T. (1995). Development and validation of a multidimensional measure of sport-specific psychological skills: The Athletic Coping Skills Inventory-28. <i>Journal of Sport &amp; Exercise Psychology</i> , 17(4), 379–398.                                                                                                                            |
| Search.Two | 131 | Pesce, C., Marchetti, R., Forte, R., Crova, C., Scatigna, M., Goudas, M., & Danish, S. J. (2016). Youth life skills training: Exploring outcomes and mediating mechanisms of a group-randomized trial in physical education. <i>Sport,</i>                                                                                                                                                                  |

|            |     |                                                                                                                                                                                                                                                                                                                                                                                                                                                                                        |
|------------|-----|----------------------------------------------------------------------------------------------------------------------------------------------------------------------------------------------------------------------------------------------------------------------------------------------------------------------------------------------------------------------------------------------------------------------------------------------------------------------------------------|
|            |     | Exercise, and Performance Psychology, 5(3), 232–246. <a href="https://doi-org.lib-e2.lib.ttu.edu/10.1037/spy0000060">https://doi-org.lib-e2.lib.ttu.edu/10.1037/spy0000060</a>                                                                                                                                                                                                                                                                                                         |
| Search.Two | 132 | Johnson, M. B., Tenenbaum, G., Edmonds, W. A., & Castillo, Y. (2008). A comparison of the developmental experiences of elite and sub-elite swimmers: Similar developmental histories can lead to differences in performance level. <i>Sport, Education and Society</i> , 13(4), 453–475. <a href="https://doi-org.lib-e2.lib.ttu.edu/10.1080/13573320802445108">https://doi-org.lib-e2.lib.ttu.edu/10.1080/13573320802445108</a>                                                       |
| Search.Two | 133 | Martin, K. A., & Mack, D. (1996). Relationships between physical self-presentation and sport competition trait anxiety: A preliminary study. <i>Journal of Sport &amp; Exercise Psychology</i> , 18(1), 75–82. <a href="https://doi-org.lib-e2.lib.ttu.edu/10.1123/jsep.18.1.75">https://doi-org.lib-e2.lib.ttu.edu/10.1123/jsep.18.1.75</a>                                                                                                                                           |
| Search.Two | 134 | Arruza, J. A., Telletxea, S., De Montes, L. G., Arribas, S., Balagué, G., Cecchini, J. A., & Brustad, R. J. (2009). Understanding the relationship between perceived development of the competition plan and sport performance: Mediating effects of self-efficacy and state depression. <i>Perceptual and Motor Skills</i> , 109(1), 304–314. <a href="https://doi-org.lib-e2.lib.ttu.edu/10.2466/pms.109.1.304-314">https://doi-org.lib-e2.lib.ttu.edu/10.2466/pms.109.1.304-314</a> |
| Search.Two | 135 | Besharat, M. A., & Pourbohloul, S. (2011). Moderating effects of self-confidence and sport self-efficacy on the relationship between competitive anxiety and sport performance. <i>Psychology</i> , 2(7), 760–765. <a href="https://doi-org.lib-e2.lib.ttu.edu/10.4236/psych.2011.27116">https://doi-org.lib-e2.lib.ttu.edu/10.4236/psych.2011.27116</a>                                                                                                                               |
| Search.Two | 136 | Miller, M., Carlyle, S., & Pease, R. (1992). The relationship between motivation and self-efficacy in competitive athletes participating in swimming, ice hockey, and basketball. <i>Journal of Sport Behavior</i> , 15(3), 201–208.                                                                                                                                                                                                                                                   |
| Search.Two | 137 | Vealey, R. S. (2019). A periodization approach to building confidence in athletes. <i>Journal of Sport Psychology in Action</i> , 10(1), 26–37. <a href="https://doi-org.lib-e2.lib.ttu.edu/10.1080/21520704.2018.1496213">https://doi-org.lib-e2.lib.ttu.edu/10.1080/21520704.2018.1496213</a>                                                                                                                                                                                        |
| Search.Two | 138 | Leonardi, T. J., Starapoli Martins, M. C., de Barros Gonçalves, C. E., Rodrigues Paes, R., & Gonçalves Moreira de Carvalho, H. J. (2019). Changes in tactical performance and self-efficacy on young female basketball players. / Variações na performance tática e na autoeficácia de jovens meninas atletas de basquetebol. <i>Brazilian Journal of Kineanthropometry &amp; Human Performance</i> , 21, 1–9.                                                                         |
| Search.Two | 139 | Nicholls, A. R., Polman, R., & Levy, A. R. (2010). Coping self-efficacy, pre-competitive anxiety, and subjective performance among athletes. <i>European Journal of Sport Science</i> , 10(2), 97–102. <a href="https://doi-org.lib-e2.lib.ttu.edu/10.1080/17461390903271592">https://doi-org.lib-e2.lib.ttu.edu/10.1080/17461390903271592</a>                                                                                                                                         |

|            |     |                                                                                                                                                                                                                                                                                                                                                                                                                       |
|------------|-----|-----------------------------------------------------------------------------------------------------------------------------------------------------------------------------------------------------------------------------------------------------------------------------------------------------------------------------------------------------------------------------------------------------------------------|
| Search.Two | 140 | Martin, J. J., & Gill, D. L. (1991). The Relationships Among Competitive Orientation, Sport-Confidence, Self-Efficacy, Anxiety, and Performance. <i>Journal of Sport &amp; Exercise Psychology</i> , 13(2), 149–159.                                                                                                                                                                                                  |
| Search.Two | 141 | Boat, R., & Taylor, I. M. (2015). Patterns of Change in Psychological Variables Leading up to Competition in Superior Versus Inferior Performers. <i>Journal of Sport &amp; Exercise Psychology</i> , 37(3), 244–256.                                                                                                                                                                                                 |
| Search.Two | 142 | Kuczka, K. K., & Treasure, D. C. (2005). Self-handicapping in competitive sport: Influence of the motivational climate, self-efficacy, and perceived importance. <i>Psychology of Sport and Exercise</i> , 6(5), 539–550. <a href="https://doi-org.lib-e2.lib.ttu.edu/10.1016/j.psychsport.2004.03.007">https://doi-org.lib-e2.lib.ttu.edu/10.1016/j.psychsport.2004.03.007</a>                                       |
| Search.Two | 143 | Kane, T. D., Marks, M. A., Zaccaro, S. J., & Blair, V. (1996). Self-efficacy, personal goals, and wrestlers' self-regulation. <i>Journal of Sport &amp; Exercise Psychology</i> , 18(1), 36–48.                                                                                                                                                                                                                       |
| Search.Two | 144 | Bruton, A. M., Mellalieu, S. D., Shearer, D., Roderique-Davies, G., & Hall, R. (2013). Performance accomplishment information as predictors of self-efficacy as a function of skill level in amateur golf. <i>Journal of Applied Sport Psychology</i> , 25(2), 197–208. <a href="https://doi-org.lib-e2.lib.ttu.edu/10.1080/10413200.2012.705802">https://doi-org.lib-e2.lib.ttu.edu/10.1080/10413200.2012.705802</a> |
| Search.Two | 145 | Smrdu, M. (2015). First-Person Experience of Optimal Sport Competition Performance of Elite Team Athletes. <i>Kinesiology</i> , 47(2), 169–178.                                                                                                                                                                                                                                                                       |
| Search.Two | 146 | Vilar, L., Araújo, D., Davids, K., & Renshaw, I. (2012). The need for “representative task design” in evaluating efficacy of skills tests in sport: A comment on Russell, Benton and Kingsley (2010). <i>Journal of Sports Sciences</i> , 30(16), 1727–1730. <a href="https://doi-org.lib-e2.lib.ttu.edu/10.1080/02640414.2012.679674">https://doi-org.lib-e2.lib.ttu.edu/10.1080/02640414.2012.679674</a>            |
| Search.Two | 147 | Meijen, C., Jones, M., McCarthy, P., Sheffield, D., & Allen, M. (2013). Cognitive and affective components of challenge and threat states. <i>Journal of Sports Sciences</i> , 31(8), 847–855.                                                                                                                                                                                                                        |
| Search.Two | 148 | Zabala, M., Morente-Sánchez, J., Mateo-March, M., & Sanabria, D. (2016). Relationship between self-reported doping behavior and psychosocial factors in adult amateur cyclists. <i>The Sport Psychologist</i> , 30(1), 68–75. <a href="https://doi-org.lib-e2.lib.ttu.edu/10.1123/tsp.2014-0168">https://doi-org.lib-e2.lib.ttu.edu/10.1123/tsp.2014-0168</a>                                                         |
| Search.Two | 149 | Bueno, J., Capdevila, L., & Fernández-Castro, J. (2002). Sufrimiento competitivo y rendimiento en deportes de resistencia = Competitive suffering and performance in endurance sports. <i>Revista de Psicología Del Deporte</i> , 11(2), 209–226.                                                                                                                                                                     |
| Search.Two | 150 | Middlemas, S., & Harwood, C. (2020). A pre-match video self-modeling intervention in elite youth football. <i>Journal of</i>                                                                                                                                                                                                                                                                                          |



|            |     |                                                                                                                                                                                                                                                                                                                                                                                                                 |
|------------|-----|-----------------------------------------------------------------------------------------------------------------------------------------------------------------------------------------------------------------------------------------------------------------------------------------------------------------------------------------------------------------------------------------------------------------|
|            |     | Applied Sport Psychology, 32(5), 450–475. <a href="https://doi-org.lib-e2.lib.ttu.edu/10.1080/10413200.2019.1590481">https://doi-org.lib-e2.lib.ttu.edu/10.1080/10413200.2019.1590481</a>                                                                                                                                                                                                                       |
| Search.Two | 151 | Boes, R., Harung, H. S., Travis, F., & Pensgaard, A. M. (2014). Mental and physical attributes defining world-class Norwegian athletes: Content analysis of interviews. <i>Scandinavian Journal of Medicine &amp; Science in Sports</i> , 24(2), 422–427. <a href="https://doi-org.lib-e2.lib.ttu.edu/10.1111/j.1600-0838.2012.01498.x">https://doi-org.lib-e2.lib.ttu.edu/10.1111/j.1600-0838.2012.01498.x</a> |
| Search.Two | 152 | McAuley, E., & Gill, D. (1983). Reliability and validity of the physical self-efficacy scale in a competitive sport setting. <i>Journal of Sport Psychology</i> , 5(4), 410–418.                                                                                                                                                                                                                                |
| Search.Two | 153 | Weiss 1989 Head Over Heels With Success: The Relationship Between Self-Efficacy and Performance in Competitive Youth Gymnastics. (1989). <i>Journal of Sport &amp; Exercise Psychology</i> , 11(4), 444–451.                                                                                                                                                                                                    |
| Search.Two | 154 | Scanlan, T. K., & Passer, M. W. (1979). Factors Influencing the Competitive Performance Expectancies of Young Female Athletes. <i>Journal of Sport Psychology</i> , 1(3), 212–220.                                                                                                                                                                                                                              |
| Search.Two | 155 | Jones, M., Meijen, C., McCarthy, P. J., & Sheffield, D. (2009). A Theory of Challenge and Threat States in Athletes. <i>International Review of Sport &amp; Exercise Psychology</i> , 2(2), 161–180.                                                                                                                                                                                                            |
| Search.Two | 156 | Otten, M. (2009). Choking vs clutch performance: A study of sport performance under pressure. <i>Journal of Sport &amp; Exercise Psychology</i> , 31(5), 583–601. <a href="https://doi-org.lib-e2.lib.ttu.edu/10.1123/jsep.31.5.583">https://doi-org.lib-e2.lib.ttu.edu/10.1123/jsep.31.5.583</a>                                                                                                               |
| Search.Two | 157 | Slimani, M., Chamari, K., Boudhiba, D., & Chéour, F. (2016). Mediator and moderator variables of imagery use-motor learning and sport performance relationships: a narrative review. <i>Sport Sciences for Health</i> , 12(1), 1–9.                                                                                                                                                                             |
| Search.Two | 158 | Martin, J. J., & Gill, D. L. (1995). The relationships of competitive orientations and self-efficacy to goal importance, thoughts, and performance in high school distance runners. <i>Journal of Applied Sport Psychology</i> , 7(1), 50–62. <a href="https://doi-org.lib-e2.lib.ttu.edu/10.1080/10413209508406300">https://doi-org.lib-e2.lib.ttu.edu/10.1080/10413209508406300</a>                           |
| Search.Two | 159 | Lee, C. (1982). Self-efficacy as a Predictor of Performance in Competitive Gymnastics. <i>Journal of Sport Psychology</i> , 4(4), 405–409.                                                                                                                                                                                                                                                                      |
| Search.Two | 160 | Hazell, J., Cotterill, S. T., & Hill, D. M. (2014). An exploration of pre-performance routines, self-efficacy, anxiety and performance in semi-professional soccer. <i>European Journal of Sport Science</i> , 14(6), 603–610. <a href="https://doi-org.lib-e2.lib.ttu.edu/10.1080/17461391.2014.888484">https://doi-org.lib-e2.lib.ttu.edu/10.1080/17461391.2014.888484</a>                                    |

|            |     |                                                                                                                                                                                                                                                                                                                                                              |
|------------|-----|--------------------------------------------------------------------------------------------------------------------------------------------------------------------------------------------------------------------------------------------------------------------------------------------------------------------------------------------------------------|
| Search.Two | 161 | Duncan & McAuley 1987 Efficacy Expectations and Perceptions of Causality in Motor Performance. (1987). <i>Journal of Sport Psychology</i> , 9(4), 385–393.                                                                                                                                                                                                   |
| Search.Two | 162 | Rojas, N. G. (2007). Implicaciones de la autoeficacia en el rendimiento deportivo = Implications of self-efficacy in sporting performance. <i>Pensamiento Psicológico</i> , 3(9), 21–32.                                                                                                                                                                     |
| Search.Two | 163 | Fazlagić, A., & Belić, M. (2011). Lokus Kontrole I Flow Uspješnih Sportista. / Locus of Control and Flow of Successful Sportsman. <i>Sportekspert</i> , 4(1/2), 7–11.                                                                                                                                                                                        |
| Search.Two | 164 | Thelwell, R. C., & Maynard, I. W. (2000). Professional cricketers' perceptions of the importance of antecedents influencing repeatable good performance. <i>Perceptual and Motor Skills</i> , 90(2), 649–658. <a href="https://doi-org.lib-e2.lib.ttu.edu/10.2466/PMS.90.2.649-658">https://doi-org.lib-e2.lib.ttu.edu/10.2466/PMS.90.2.649-658</a>          |
| Search.Two | 165 | Miller, M. (1993). Efficacy strength and performance in competitive swimmers of different skill levels. <i>International Journal of Sport Psychology</i> , 24(3), 284–296.                                                                                                                                                                                   |
| Search.Two | 166 | Beaven, C. M. (2017). Mental Rehearsal Impacts Hormones and Subsequent Sport-Specific Performance. <i>New Zealand Journal of Sports Medicine</i> , 44(1), 41–42.                                                                                                                                                                                             |
| Search.Two | 167 | Hall, C. R., Munroe-Chandler, K. J., Fishburne, G. J., & Hall, N. D. (2009). The Sport Imagery Questionnaire for Children (SIQ-C). <i>Measurement in Physical Education and Exercise Science</i> , 13(2), 93–107. <a href="https://doi-org.lib-e2.lib.ttu.edu/10.1080/10913670902812713">https://doi-org.lib-e2.lib.ttu.edu/10.1080/10913670902812713</a>    |
| Search.Two | 168 | Martin, J. J. (1995). Competitive orientation, self-efficacy and goal importance in Filipino marathoners. <i>International Journal of Sport Psychology</i> , 26(3), 348–358.                                                                                                                                                                                 |
| Search.Two | 169 | Bruton, A. M., Shearer, D. A., & Mellalieu, S. D. (2019). Who said “there is no ‘I’ in team”? The effects of observational learning content level on efficacy beliefs in groups. <i>Psychology of Sport &amp; Exercise</i> , 45, N.PAG.                                                                                                                      |
| Search.Two | 170 | Toering, T. T., Elferink-Gemser, M. T., Jordet, G., & Visscher, C. (2009). Self-regulation and performance level of elite and non-elite youth soccer players. <i>Journal of Sports Sciences</i> , 27(14), 1509–1517. <a href="https://doi-org.lib-e2.lib.ttu.edu/10.1080/02640410903369919">https://doi-org.lib-e2.lib.ttu.edu/10.1080/02640410903369919</a> |
| Search.Two | 171 | Treasure, D. C., Monson, J., & Lox, C. L. (1996). Relationship between self-efficacy, wrestling performance, and affect prior to competition. <i>The Sport Psychologist</i> , 10(1), 73–83.                                                                                                                                                                  |
| Search.Two | 172 | Chow, G. M., Hepler, T. J., & Feltz, D. L. (2007). The effects of group motivational processes on individual performance in women's volleyball. <i>Journal of Sport &amp; Exercise Psychology</i> , 29, S152–S153.                                                                                                                                           |
| Search.Two | 173 | Gernigon, C., Briki, W., & Eykens, K. (2010). The dynamics of psychological momentum in sport: The role of ongoing                                                                                                                                                                                                                                           |

|            |     |                                                                                                                                                                                                                                                                                                                                                                                                              |
|------------|-----|--------------------------------------------------------------------------------------------------------------------------------------------------------------------------------------------------------------------------------------------------------------------------------------------------------------------------------------------------------------------------------------------------------------|
|            |     | history of performance patterns. <i>Journal of Sport &amp; Exercise Psychology</i> , 32(3), 377–400.                                                                                                                                                                                                                                                                                                         |
| Search.Two | 174 | Hall, H. K., & Kerr, A. W. (1998). Predicting achievement anxiety: A social-cognitive perspective. <i>Journal of Sport &amp; Exercise Psychology</i> , 20(1), 98–111.                                                                                                                                                                                                                                        |
| Search.Two | 175 | Reifsteck, E. J., Anderson, S. N., Newton, J. D., & Maher, J. P. (2021). A practical guide and empirical example for implementing ecological momentary assessment in sport psychology research with athletes. <i>Sport, Exercise, and Performance Psychology</i> , 10(3), 408–422. <a href="https://doi-org.lib-e2.lib.ttu.edu/10.1037/spy0000252">https://doi-org.lib-e2.lib.ttu.edu/10.1037/spy0000252</a> |
| Search.Two | 176 | Deeter, T. E. (1990). Re-modeling expectancy and value in physical activity. <i>Journal of Sport &amp; Exercise Psychology</i> , 12(1), 86–91.                                                                                                                                                                                                                                                               |
| Search.Two | 177 | Psychountaki, M., & Zervas, Y. (2000). Competitive worries, sport confidence, and performance ratings for young swimmers. <i>Perceptual and Motor Skills</i> , 91(1), 87–94. <a href="https://doi-org.lib-e2.lib.ttu.edu/10.2466/PMS.91.5.87-94">https://doi-org.lib-e2.lib.ttu.edu/10.2466/PMS.91.5.87-94</a>                                                                                               |
| Search.Two | 178 | Coutts, A. J., & Reaburn, P. (2008). Monitoring Changes in Rugby League Players' Perceived Stress and Recovery during Intensified Training. <i>Perceptual &amp; Motor Skills</i> , 106(3), 904–916.                                                                                                                                                                                                          |
| Search.Two | 179 | Kingston, K. M., & Hardy, L. (1997). Effects of different types of goals on processes that support performance. <i>The Sport Psychologist</i> , 11(3), 277–293.                                                                                                                                                                                                                                              |
| Search.Two | 180 | Slimani, M., Tod, D., Chaabene, H., Miarka, B., & Chamari, K. (2016). Effects of Mental Imagery on Muscular Strength in Healthy and Patient Participants: A Systematic Review. <i>Journal of Sports Science &amp; Medicine</i> , 15(3), 434–450.                                                                                                                                                             |
| Search.Two | 181 | Gil Martínez, J., Capafons Bonet, A., & Labrador Encinas, F. (1993). Variables físicas y psicológicas predictoras del rendimiento deportivo y del cambio terapéutico = Physical and psychological variables predictive of sports output and therapeutical change. <i>Psicothema</i> , 5(1), 97–110.                                                                                                          |
| Search.Two | 182 | Turner, M. J., Jones, M. V., Sheffield, D., & Cross, S. L. (2012). Cardiovascular indices of challenge and threat states predict competitive performance. <i>International Journal of Psychophysiology</i> , 86(1), 48–57. <a href="https://doi-org.lib-e2.lib.ttu.edu/10.1016/j.ijpsycho.2012.08.004">https://doi-org.lib-e2.lib.ttu.edu/10.1016/j.ijpsycho.2012.08.004</a>                                 |
| Search.Two | 183 | Donovan, J. J., & Williams, K. J. (2003). Missing the mark: Effects of time and causal attributions on goal revision in response to goal-performance discrepancies. <i>Journal of Applied Psychology</i> , 88(3), 379–390. <a href="https://doi-org.lib-e2.lib.ttu.edu/10.1037/0021-9010.88.3.379">https://doi-org.lib-e2.lib.ttu.edu/10.1037/0021-9010.88.3.379</a>                                         |
| Search.Two | 184 | Wiggins, M. S. (1998). Anxiety intensity and direction: Preperformance temporal patterns and expectations in athletes. <i>Journal of Applied Sport Psychology</i> , 10(2), 201–                                                                                                                                                                                                                              |

|                             |     |                                                                                                                                                                                                                                                                                                                                                                                                                                                  |
|-----------------------------|-----|--------------------------------------------------------------------------------------------------------------------------------------------------------------------------------------------------------------------------------------------------------------------------------------------------------------------------------------------------------------------------------------------------------------------------------------------------|
|                             |     | 211. <a href="https://doi-org.lib-e2.lib.ttu.edu/10.1080/10413209808406388">https://doi-org.lib-e2.lib.ttu.edu/10.1080/10413209808406388</a>                                                                                                                                                                                                                                                                                                     |
| Search.Two                  | 185 | Suay, F., Salvador, A., González-Bono, E., Sanchís, C., Martínez, M., Martínéz-Sanchis, S., Simón, V. M., & Montoro, J. B. (1999). Effects of competition and its outcome on serum testosterone, cortisol and prolactin. <i>Psychoneuroendocrinology</i> , 24(5), 551–566. <a href="https://doi-org.lib-e2.lib.ttu.edu/10.1016/S0306-4530(99)00011-6">https://doi-org.lib-e2.lib.ttu.edu/10.1016/S0306-4530(99)00011-6</a>                       |
| Search.Two                  | 186 | Greenlees, I. A., Nunn, R. L., Graydon, J. K., & Maynard, I. W. (1999). The relationship between collective efficacy and precompetitive affect in rugby players: Testing Bandura's model of collective efficacy. <i>Perceptual and Motor Skills</i> , 89(2), 431–440. <a href="https://doi-org.lib-e2.lib.ttu.edu/10.2466/PMS.89.6.431-440">https://doi-org.lib-e2.lib.ttu.edu/10.2466/PMS.89.6.431-440</a>                                      |
| Search.Two                  | 187 | Sheard, M., & Golby, J. (2006). Effect of a Psychological Skills Training Program on Swimming Performance and Positive Psychological Development. <i>International Journal of Sport and Exercise Psychology</i> , 4(2), 149–169. <a href="https://doi-org.lib-e2.lib.ttu.edu/10.1080/1612197X.2006.9671790">https://doi-org.lib-e2.lib.ttu.edu/10.1080/1612197X.2006.9671790</a>                                                                 |
| Search.Two                  | 188 | García-Naveira Vaamonde, A. (2018). Optimismo, autoeficacia general y competitividad en jóvenes atletas de alto rendimiento. / Optimism, general self-efficacy and competitiveness in young high-performance athletes. <i>Cultura, Ciencia y Deporte</i> , 13(37), 71–81.                                                                                                                                                                        |
| Search.Two                  | 189 | García-Naveira Vaamonde, A. (2018). Autoeficacia y rendimiento en jugadores de fútbol = Self-efficacy and performance in soccer players. <i>Cuadernos de Psicología Del Deporte</i> , 18(2), 66–78.                                                                                                                                                                                                                                              |
|                             |     |                                                                                                                                                                                                                                                                                                                                                                                                                                                  |
| Hand.searched.GoogleScholar | 1   | Rogowska AM, Tataruch R, Niedźwiecki K, Wojciechowska-Maszkowska B. The Mediating Role of Self-Efficacy in the Relationship between Approach Motivational System and Sports Success among Elite Speed Skating Athletes and Physical Education Students. <i>International Journal of Environmental Research and Public Health</i> . 2022; 19(5):2899. <a href="https://doi.org/10.3390/ijerph19052899">https://doi.org/10.3390/ijerph19052899</a> |
| Hand.searched.GoogleScholar | 2   | Rafiee, S., Dana, A., Fallah, Z. (2022). Effect of Grit on Exercise Self-Efficacy and Participatory Performance in Elite Athletes. <i>Sport Psychology Studies (ie, mutaleat ravanshenasi varzeshi)</i> , 11(39), 25-46. doi: 10.22089/spsyj.2019.6788.1731                                                                                                                                                                                      |
| Hand.searched.GoogleScholar | 3   | Brace AW, George K, Lovell GP (2020) Mental toughness and self-efficacy of elite ultra- marathon runners. <i>PLoS ONE</i> 15(11): e0241284. <a href="https://doi.org/10.1371/journal.pone.0241284">https://doi.org/10.1371/journal.pone.0241284</a>                                                                                                                                                                                              |

|                             |    |                                                                                                                                                                                                                                                                                                                               |
|-----------------------------|----|-------------------------------------------------------------------------------------------------------------------------------------------------------------------------------------------------------------------------------------------------------------------------------------------------------------------------------|
| Hand.searched.GoogleScholar | 4  | Walter N, Nikoleizig L, Alfermann D. Effects of Self-Talk Training on Competitive Anxiety, Self-Efficacy, Volitional Skills, and Performance: An Intervention Study with Junior Sub-Elite Athletes. <i>Sports</i> . 2019; 7(6):148. <a href="https://doi.org/10.3390/sports7060148">https://doi.org/10.3390/sports7060148</a> |
| Hand.searched.GoogleScholar | 5  | Karacam, A., & Adiguzel, N. S. (2019). Examining the relationship between referee performance and self-efficacy. <i>European Journal of Educational Research</i> , 8(1), 377-382. doi: 10.12973/eu-jer.8.1.377                                                                                                                |
| Hand.searched.GoogleScholar | 6  | Samendinger, S., Hill, C. R., Hepler, T. J., & Feltz, D. L. (2019). Why Residuals Are Important in the Self-Efficacy-Performance Relationship Analysis: A Study Across 12 Cycling Sessions. <i>Journal of Physical Activity &amp; Health</i> , 16(6), 455-460.                                                                |
| Hand.searched.GoogleScholar | 7  | Sari 2015. An Investigation of Imagery, Intrinsic Motivation, Self-efficacy and Performance in Athletes                                                                                                                                                                                                                       |
| Hand.searched.GoogleScholar | 8  | Sari 2015. Does goal orientation...                                                                                                                                                                                                                                                                                           |
| Hand.searched.GoogleScholar | 9  | Fitzimmons, P. A., Landers, D. M., Thomas, J. R., & van der Mars, H. (1991). Does self-efficacy predict performance in experienced weightlifters? / La compétence percue prédit-elle la performance chez des halterophiles expérimentés. <i>Research Quarterly for Exercise &amp; Sport</i> , 62(4), 424-431.                 |
| Hand.searched.GoogleScholar | 10 | Miller, M., Carlyle, S., & Pease, R. (1992). The relationship between motivation and self-efficacy in competitive athletes participating in swimming, ice hockey, and basketball. <i>Journal of Sport Behavior</i> , 15(3), 201-208.                                                                                          |
| Hand.searched.GoogleScholar | 11 | Stajkovic, A. D., & Luthans, F. (1998). Self-efficacy and work-related performance: A meta-analysis. <i>Psychological Bulletin</i> , 124(2), 240. <a href="https://doi-org.lib-e2.lib.ttu.edu/10.1037/0033-2909.124.2.240">https://doi-org.lib-e2.lib.ttu.edu/10.1037/0033-2909.124.2.240</a>                                 |
| Hand.searched.GoogleScholar | 12 | Bray, S. R., Balaguer, I., & Duda, J. L. (2004). The relationship of task self-efficacy and role efficacy beliefs to role performance in Spanish youth soccer. <i>Journal of Sports Sciences</i> , 22(5), 429-437.                                                                                                            |
| Hand.searched.GoogleScholar | 13 | Maeda et al. 2003                                                                                                                                                                                                                                                                                                             |
| Hand.searched.GoogleScholar | 14 | Singh, T., Bhardwaj, G., & Bhardwaj, V. (2009). Effect of self-efficacy on the performance of athletes. <i>Journal of Exercise Science and Physiotherapy</i> , 5(2), 110-114. <a href="https://search.informit.org/doi/10.3316/informit.856176212483236">https://search.informit.org/doi/10.3316/informit.856176212483236</a> |
| Hand.searched.GoogleScholar | 15 | Barker, J., Jones, M., & Greenlees, I. (2010). Assessing the Immediate and Maintained Effects of Hypnosis on Self-Efficacy and Soccer Wall-Volley Performance. <i>Journal of Sport &amp; Exercise Psychology</i> , 32(2), 243-252.                                                                                            |

|                                   |         |                                                                                                                                                                                                                                                                                                                                     |
|-----------------------------------|---------|-------------------------------------------------------------------------------------------------------------------------------------------------------------------------------------------------------------------------------------------------------------------------------------------------------------------------------------|
| Hand.searched.GoogleScholar       | 16      | Llewellyn, D. J., Sanchez, X., Asghar, A., & Jones, G. (2008). Self-efficacy, risk taking and performance in rock climbing. <i>Personality and Individual Differences</i> , 45(1), 75–81. <a href="https://doi-org.lib-e2.lib.ttu.edu/10.1016/j.paid.2008.03.001">https://doi-org.lib-e2.lib.ttu.edu/10.1016/j.paid.2008.03.001</a> |
| Hand.searched.GoogleScholar       | 17      | Ortega, E., Olmedilla, A., de Baranda, P. S., & Gómez, M. Á. (2009). Relationship between the level of self-efficacy, performance indicators, and participation in youth basketball. <i>Revista de Psicología Del Deporte</i> , 18(Suppl), 337–342.                                                                                 |
| Hand.searched.GoogleScholar       | 18      | Cumming, J., Nordin, S. M., Horton, R., & Reynolds, S. (2006). Examining the Direction of Imagery and Self-Talk on Dart-Throwing Performance and Self Efficacy. <i>The Sport Psychologist</i> , 20(3), 257–274.                                                                                                                     |
| Hand.searched.GoogleScholar       | 19      | Hayslip Jr., B., Raab, C. M., Baczewski, P. C., & Petrie, T. A. (2010). The Development and Validation of the Golf Self-Efficacy Scale. <i>Journal of Sport Behavior</i> , 33(4), 427–441.                                                                                                                                          |
| Hand.searched.GoogleScholar       | 20      | Chang, Y. K., Ho, L. A., Lu, F. J. H., Ou, C. C., Song, T. F., & Gill, D. (2014). Self-talk and softball performance: The role of self-talk nature, motor task characteristics, and self-efficacy in novice softball players. <i>Psychology of Sport and Exercise</i> , 15(1), 139-145.                                             |
| Hand.searched.GoogleScholar       | 21      | Pete Coffee, Tim Rees & S. Alexander Haslam (2009) Bouncing back from failure: The interactive impact of perceived controllability and stability on self-efficacy beliefs and future task performance, <i>Journal of Sports Sciences</i> , 27:11, 1117-1124, DOI: 10.1080/02640410903030297                                         |
| Hand.searched.GoogleScholar       | 22      | Lisa J. van Raalte & Karlee A. Posther (2019) Examining social support, self-efficacy, stress, and performance, in U.S. Division I collegiate student-athletes' academic and athletic lives, <i>Journal for the Study of Sports and Athletes in Education</i> , 13:2, 75-96, DOI: 10.1080/19357397.2019.1635419                     |
| Hand.searched.GoogleScholar       | 23      | Pullen, B.J.; Oliver, J.L.; Lloyd, R.S.; Knight, C.J. Relationships between Athletic Motor Skill Competencies and Maturity, Sex, Physical Performance, and Psychological Constructs in Boys and Girls. <i>Children</i> 2022, 9, 375. <a href="https://doi.org/10.3390/children9030376">https://doi.org/10.3390/children9030376</a>  |
|                                   |         |                                                                                                                                                                                                                                                                                                                                     |
| Search of 2022-23                 |         |                                                                                                                                                                                                                                                                                                                                     |
| Hand-searching SPORTDiscus        | Include | Aikawa, S., & Takai, H. (2021). Relationship Between Imagery Ability, Performance, and Variables Related to Performance. <i>The Sport Psychologist</i> , 35(2), 123–130. <a href="https://doi.org/10.1123/tsp.2019-0165">https://doi.org/10.1123/tsp.2019-0165</a>                                                                  |
| Review of Jekauc efficacy studies | Include | Beauchamp, M. R., & Whinton, L. C. (2005). Self-Efficacy and Other-Efficacy in Dyadic Performance: Riding as One in Equestrian Eventing. <i>Journal of Sport and Exercise Psychology</i> , 27(2), 245–252. <a href="https://doi.org/10.1123/jsep.27.2.245">https://doi.org/10.1123/jsep.27.2.245</a>                                |

|                |                          |                                                                                                                                                                                                                                                                                                                                                                                                                                                                                                                          |
|----------------|--------------------------|--------------------------------------------------------------------------------------------------------------------------------------------------------------------------------------------------------------------------------------------------------------------------------------------------------------------------------------------------------------------------------------------------------------------------------------------------------------------------------------------------------------------------|
| EBSCO Search 1 | No competition           | Schüler, J., Stähler, J., & Wolff, W. (2023). Mind-over-body beliefs in sport and exercise: A driving force for training volume and performance, but with risks for exercise addiction. <i>Psychology of Sport &amp; Exercise</i> , 68, N.PAG.                                                                                                                                                                                                                                                                           |
|                | Review, no original data | Williamson, O., Swann, C., Bennett, K. J. M., Bird, M. D., Goddard, S. G., Schweickle, M. J., & Jackman, P. C. (2022). The performance and psychological effects of goal setting in sport: A systematic review and meta-analysis. <i>International Review of Sport and Exercise Psychology</i> . <a href="https://doi-org.lib-e2.lib.ttu.edu/10.1080/1750984X.2022.2116723">https://doi-org.lib-e2.lib.ttu.edu/10.1080/1750984X.2022.2116723</a>                                                                         |
| EBSCO Search 2 | No competition           | Ortiz Romero, M. T., Garrido Guzmán, M. E., & Castañeda Vázquez, C. (2022). Autoeficacia y resiliencia: diferencias entre deportistas practicantes de fitness/culturismo y no deportistas. / Self-efficacy and resilience: differences between fitness/bodybuilding athletes and nonathletes. <i>Retos: Nuevas Perspectivas de Educación Física, Deporte y Recreación</i> , 44, 232–241.                                                                                                                                 |
|                | No competition           | Bastik, C., & Gümüşdag, H. (2022). A Comparison of Mental Training Skills Levels of Handball and Basketball Players. <i>International Journal of Curriculum and Instruction</i> , 14(3), 2391–2399.                                                                                                                                                                                                                                                                                                                      |
|                | Not peer reviewed        | Troutman, T. D. (2023). A qualitative exploration: Factors impacting the academic achievement of high school student-athletes [ProQuest Information & Learning]. In <i>Dissertation Abstracts International Section A: Humanities and Social Sciences</i> (Vol. 84, Issue 5–A).                                                                                                                                                                                                                                          |
|                | no performance measure   | Meijen, C., McCormick, A., Anstiss, P. A., & Marcora, S. M. (2022). “Short and Sweet”: A Randomized Controlled Initial Investigation of Brief Online Psychological Interventions With Endurance Athletes. <i>Sport Psychologist</i> , 36(1), 20–28.                                                                                                                                                                                                                                                                      |
|                | no self-efficacy measure | Duncan, M. J., Eyre, E. L. J., Noon, M. R., Morris, R., Thake, C. D., Clarke, N. D., & Cunningham, A. J. (2022). Actual and perceived motor competence mediate the relationship between physical fitness and technical skill performance in young soccer players. <i>European Journal of Sport Science</i> , 22(8), 1196–1203.                                                                                                                                                                                           |
|                | No competition           | Schneider, J., Matheson, E. L., Tinoco, A., Gentili, C., White, P., Boucher, C., Silva-Breen, H., Goorevich, A., Diedrichs, P. C., & LaVoi, N. M. (2023). Body confident coaching: A pilot randomized controlled trial evaluating the acceptability of a web-based body image intervention for coaches of adolescent girls. <i>Journal of Applied Sport Psychology</i> . <a href="https://doi-org.lib-e2.lib.ttu.edu/10.1080/10413200.2023.2212023">https://doi-org.lib-e2.lib.ttu.edu/10.1080/10413200.2023.2212023</a> |
|                | Review, no original data | Hebard, S. P., Bissett, J. E., Kroshus, E., Beamon, E. R., & Reich, A. (2023). A Content Analysis of Mental Health                                                                                                                                                                                                                                                                                                                                                                                                       |

|                                      |                                                                       |                                                                                                                                                                                                                                                                                                                                                                                                                                                  |
|--------------------------------------|-----------------------------------------------------------------------|--------------------------------------------------------------------------------------------------------------------------------------------------------------------------------------------------------------------------------------------------------------------------------------------------------------------------------------------------------------------------------------------------------------------------------------------------|
|                                      |                                                                       | Literacy Education for Sport Coaches. <i>Journal of Clinical Sport Psychology</i> , 17(2), 165–175.                                                                                                                                                                                                                                                                                                                                              |
|                                      | Repeat from Search 1                                                  | Williamson, O., Swann, C., Bennett, K. J. M., Bird, M. D., Goddard, S. G., Schweickle, M. J., & Jackman, P. C. (2022). The performance and psychological effects of goal setting in sport: A systematic review and meta-analysis. <i>International Review of Sport and Exercise Psychology</i> . <a href="https://doi-org.lib-e2.lib.ttu.edu/10.1080/1750984X.2022.2116723">https://doi-org.lib-e2.lib.ttu.edu/10.1080/1750984X.2022.2116723</a> |
|                                      |                                                                       |                                                                                                                                                                                                                                                                                                                                                                                                                                                  |
| Google scholar 2023 August 30 search | no methodology section, no indication of actual competition           | Yang, X., & Mojtahe, K. (2023). Understanding the Role of Self-Efficacy in Sports Performance: A Longitudinal Study. <i>Revista de Psicología del Deporte (Journal of Sport Psychology)</i> , 32(1), 311-319.                                                                                                                                                                                                                                    |
| Reviewed page 1 of results           | No self-efficacy (CSAI-2 confidence)                                  | Mercader-Rubio, I., Gutiérrez Ángel, N., Silva, S., Moisés, A., & Brito-Costa, S. (2023). Relationships between somatic anxiety, cognitive anxiety, self-efficacy, and emotional intelligence levels in university physical education students. <i>Frontiers in Psychology</i> , 13, 1059432.                                                                                                                                                    |
|                                      | No competition                                                        | Volgemute, K., Vazne, Z., Krauksta, D., & Cosma, G. A. (2023). The improvement of athletes' imagery ability and physical self-efficacy for the growth of athletic achievements in sport model. <i>Journal of Physical Education and Sport</i> , 23(3), 748-755.                                                                                                                                                                                  |
|                                      | cross-sectional, no actual competition                                | Reverdito, R. S., Fonseca, S., Lopes, A., Aires, K., Santos Alves, L., Alves de Lima, L., ... & Gonçalves, C. (2023). Sources of Sport Satisfaction and Perceived Self-Efficacy Among Youth in a Competitive Environment. <i>Perceptual and Motor Skills</i> , 00315125231167460.                                                                                                                                                                |
|                                      | no actual competition, retrospective coach/parent ratings of athletes | Di Corrado, D., Sagone, E., Buscemi, A., & Coco, M. (2023). The Relationship between Anger Expression and Performance Score in Parents and Coaches: The Mediating Role of Self-Efficacy and Assertiveness. <i>International Journal of Environmental Research and Public Health</i> , 20(7), 5372.                                                                                                                                               |
|                                      | Not with athletes                                                     | Richlan, F., Thürmer, J. L., Braid, J., Kastner, P., & Leitner, M. C. (2023). Subjective experience, self-efficacy, and motivation of professional football referees during the COVID-19 pandemic. <i>Humanities and Social Sciences Communications</i> , 10(1), 1-15.                                                                                                                                                                           |
|                                      | Pre-print, not peer reviewed                                          | Yu, C., Kao, C., Wu, J., Hung, E., Chang, W., Yang, R., ... & Hung, T. (2023). Effects of self-efficacy on frontal midline theta power and golf putting performance.                                                                                                                                                                                                                                                                             |
|                                      | Not sport skill                                                       | Zulkipli, U. N., Nor, M. A. M., Lubis, J., & Shaari, J. S. (2023, June). Relationship between Self-Efficacy and Push-Up Performance among Male Gymnasium Members.                                                                                                                                                                                                                                                                                |



|                                      |                                                                                                       |                                                                                                                                                                                                                                                                                                                                                            |
|--------------------------------------|-------------------------------------------------------------------------------------------------------|------------------------------------------------------------------------------------------------------------------------------------------------------------------------------------------------------------------------------------------------------------------------------------------------------------------------------------------------------------|
|                                      |                                                                                                       | In Proceedings of the 8th ACPES (ASEAN Council of Physical Education and Sport) International Conference, ACPES 2022, October 28th–30th, 2022, Medan, North Sumatera, Indonesia.                                                                                                                                                                           |
|                                      | Not sport skill                                                                                       | Cudicio, A., & Agosti, V. (2023). THE LINK BETWEEN PHYSICAL PERFORMANCE AND SELF-EFFICACY: HOW MUCH CAN I JUMP?. ITALIAN JOURNAL OF HEALTH EDUCATION, SPORT AND INCLUSIVE DIDACTICS, 7(2).                                                                                                                                                                 |
| Google scholar 2022 August 30 search | study 1: cross-sectional, not prior to performance, hypothetical competition; study 2: no performance | Kwon, T., Shin, S., & Shin, M. (2022). The effect of observational learning on self-efficacy by sport competition condition, performance level of team members, and whether you win or lose. International Journal of Environmental Research and Public Health, 19(16), 10148.                                                                             |
| Reviewed page 1 of results           | Not sport skill                                                                                       | Horcajo, J., Santos, D., & Higuero, G. (2022). The effects of self-efficacy on physical and cognitive performance: An analysis of meta-certainty. Psychology of Sport and Exercise, 58, 102063.                                                                                                                                                            |
|                                      | cross-sectional, not prior to performance                                                             | Wang, C. M., Hong, J. C., Ye, J. H., & Ye, J. N. (2022). The relationship among gameplay self-efficacy, competition anxiety, and the performance of eSports players. Entertainment Computing, 42, 100489.                                                                                                                                                  |
|                                      | No actual competition                                                                                 | Rogowska, A. M., Tataruch, R., Niedźwiecki, K., & Wojciechowska-Maszkowska, B. (2022). The mediating role of self-efficacy in the relationship between approach motivational system and sports success among elite speed skating athletes and physical education students. International journal of environmental research and public health, 19(5), 2899. |
|                                      | No actual competition                                                                                 | Stephen, S. A., Habeeb, C. M., & Arthur, C. A. (2022). Congruence of efficacy beliefs on the coach-athlete relationship and athlete anxiety: Athlete self-efficacy and coach estimation of athlete self-efficacy. Psychology of sport and exercise, 58, 102062.                                                                                            |
|                                      | No competition                                                                                        | Satjawathee, T., Ma, S. C., Shu, S. T., & Chang, C. H. (2022). The moderating effect of self-efficacy on fitness use innovativeness and usage pattern. Sustainability, 15(1), 586.                                                                                                                                                                         |
|                                      | Not athletes                                                                                          | Golsanamlou, M., Hamidi, M., Rajabi Noush Abadi, H., & Sajjadi, S. N. (2022). The Effect of Empowerment on Physical Education Teachers' Self-efficacy and Job Performance. Research on Educational Sport, 10(26), 220-197.                                                                                                                                 |
|                                      | Not athletes                                                                                          | Baniasadi, T., Ranjbari, S., Mofrad, S. K., & Amir, D. (2022). Associations between device-measured physical activity                                                                                                                                                                                                                                      |

|  |                                                                                                         |                                                                                                                                                                                                                                                                                                                                                                                                                      |
|--|---------------------------------------------------------------------------------------------------------|----------------------------------------------------------------------------------------------------------------------------------------------------------------------------------------------------------------------------------------------------------------------------------------------------------------------------------------------------------------------------------------------------------------------|
|  |                                                                                                         | and balance performance in children: Mediating role of motor self-efficacy. <i>Biomedical Human Kinetics</i> , 14(1), 252-258.                                                                                                                                                                                                                                                                                       |
|  | No competition                                                                                          | Oguntuase, S. B., & Sun, Y. (2022). Effects of mindfulness training and locus of control on self-efficacy of professional football players in Nigeria. <i>Journal of Physical Education &amp; Sport</i> , 22(5).                                                                                                                                                                                                     |
|  | No competition                                                                                          | Piussi, R., Beischer, S., Thomeé, R., Thomeé, C., Sansone, M., Samuelsson, K., & Senorski, E. H. (2022). Greater psychological readiness to return to sport, as well as greater present and future knee-related self-efficacy, can increase the risk for an anterior cruciate ligament re-rupture: a matched cohort study. <i>Arthroscopy: The Journal of Arthroscopic &amp; Related Surgery</i> , 38(4), 1267-1276. |
|  | No competition                                                                                          | Stanković, N., Todorović, D., Milošević, N., Mitrović, M., & Stojiljković, N. (2022). Aggressiveness in judokas and team athletes: Predictive value of personality traits, emotional intelligence and self-efficacy. <i>Frontiers in psychology</i> , 12, 824123.                                                                                                                                                    |
|  | No competition                                                                                          | Liu, C. (2022). Research on the influence of college students' participation in sports activities on their sense of inferiority based on self-esteem and general self-efficacy. <i>Frontiers in Psychology</i> , 13, 994209.                                                                                                                                                                                         |
|  | cross-sectional, not prior to performance, and no description of sport performance (how measured, etc.) | Ahmad, N., Marwat, M. K., Iqbal, Y., Nizami, R., Shah, M., Saman, S., & Mehmood, K. (2022). IMPACT OF SPORT-PERFECTIONISM AND SELF-EFFICACY ON ACHIEVEMENT MOTIVATION AND SPORTS PERFORMANCE (A CASE STUDY OF INDIVIDUAL DIFFERENCES OF UNIVERSITY STUDENTS OF DISTRICT LAHORE). <i>PalArch's Journal of Archaeology of Egypt/Egyptology</i> , 19(2), 1275-1285.                                                     |
|  | no data with efficacy and shot performance                                                              | Metan, H., & Küçük, V. (2022). The Effect of Psychological Skill Training Program and Positive Feedback on Handball Player's Self-Efficacy Beliefs and their Shot Accuracy. <i>Annals of Applied Sport Science</i> , 10(3), 0-0.                                                                                                                                                                                     |
